# Supplementary material for: Lower rim mono-functionalization of resorcinarenes
Source: Royal Society of Chemistry journal article supplement (doi:10.1039/b506048f), 2005-01-01

## SUPPORTING INFORMATION FOR MONO-FUNCTIONALIZATION OF RESORCINARENES

### Experimental Section

#### General

$^1\text{H}$  NMR and  $^{13}\text{C}$  NMR were obtained using a Bruker DRX-600 or a Bruker AM-300 spectrometer. MALDI-FTMS experiments were performed on an IonSpec FTMS mass spectrometer. Electrospray MS experiments were performed on a single-quadrapole Perkin-Elmer API-100 Sciex mass spectrometer. All reagents were used as purchased from Aldrich unless otherwise indicated.

#### Monohydroxy Resorcinarene (1):

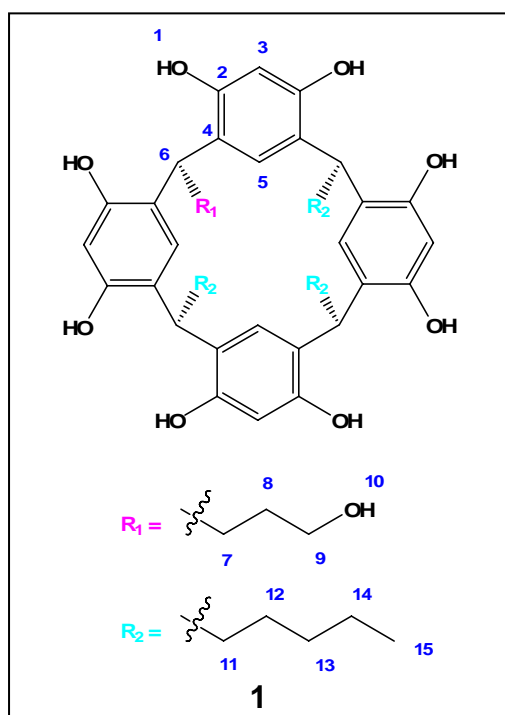

To a stirred solution of resorcinol (20.00 g, 181.6 mmol) in MeOH (150 ml) cooled to 0 °C was added 2,3-dehydro furan (3.44 ml, 45.41 mmol, 1.0 eq.) and hexanal (16.76 ml, 136.2 mmol, 3.0 eq.). HCl (conc.) (36 ml) was then added dropwise over 10 minutes. The reaction mixture was heated to 50 °C and stirred for 7 days. The red solution was poured into distilled water (1 l), stirred for 1 hour and the precipitate was collected by vacuum filtration. The solid was dissolved in acetone (200 ml), dried over MgSO<sub>4</sub>, filtered and concentrated *in vacuo*. Purification of monohydroxy resorcinarene **1** was achieved by flash chromatography (silica) using a CH<sub>2</sub>Cl<sub>2</sub>/acetone 8:2 to 6:4 gradient.

- **Yield:** 8.45 g (24.6 %)
- **Symmetry:** C<sub>v</sub>
- **$^1\text{H}$ -NMR (Acetone-*d*<sub>6</sub>, 600 MHz):**  $\delta$  = 8.45 (s, 8 H, **1**), 7.58 (s, 4 H, **5**), 6.24 (s, 4 H, **3**), 4.31 (t, 4 H,  $^3\text{J}$  = 8.1 Hz, **6**), 3.60 (dt, 2 H,  $^3\text{J}$  = 5.2 Hz,  $^3\text{J}$  = 6.4 Hz, **9**), 3.45 (t, 1 H,  $^3\text{J}$  = 5.2 Hz, **10**), 2.3 (m, 8 H, **7,11**), 1.52 (m, 2 H, **8**), 1.34 (m, 18 H, **12-14**), 0.90 (m, 9 H, **15**) ppm

- **$^{13}\text{C-NMR}$  (Acetone- $d_6$ , 150.9 MHz):**  $\delta = 153.58/153.54$  (8 C, **2**), 126.41/126.37/126.19/126.17/126.05 (12 C, **4,5**), 104.59 (4 C, **3**), 63.33 (1 C, **9**), 35.34, 35.27, 35.19, 35.11, 34.99, 33.69, 33.66, 33.591, 33.04, 31.57, 31.28, 29.67, 29.65, 29.60, 24.41, 24.39, 15.44 (3 C, **15**) ppm
- **MS (ESI-high acc.):**  $m/z = 779.41$   $[\text{MNa}]^+$

### Octabenzylated Resorcinarene (**2**):

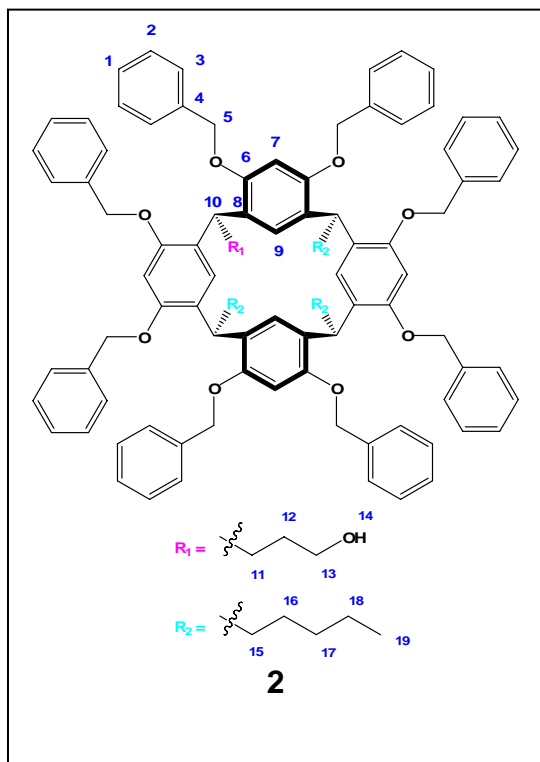

To a stirred solution of **1** (2.0 g, 2.64 mmol) in acetone (80 ml) under  $\text{N}_2$  atmosphere was added  $\text{K}_2\text{CO}_3$  (5.4 g, 39.1 mmol) and  $\text{NaI}$  (3.0 g, 20.0 mmol). The mixture was stirred for 2 hours at room temperature. Benzyl bromide (4.52 g, 3.12 ml, 26.4 mmol, 10 eq.) was added over 5 minutes and the reaction mixture was heated to reflux for 7 days.

To the cooled crude reaction mixture was added ethyl acetate (100 ml) and the precipitate was removed by vacuum filtration. The filtrate was concentrated *in vacuo*. Purification of benzylated monohydroxy resorcinarene **2** was achieved by flash chromatography (silica) using a hexanes/ethyl acetate 6:1 to 4:1 gradient.

- **Yield:** 2.0 g (51 %)
- **Symmetry:**  $\text{C}_1$
- **$^1\text{H-NMR}$  ( $\text{CDCl}_3$ , 300 MHz):**  $\delta = 7.20$  (br. s, 28 H, **1/2/3/9**), 6.81 („d“, 4 H, **7**), 5.0/4.8 (m, 20 H, **5/10**), 3.54 (m, 2 H, **13**), 3.29 (t, 1 H,  $^3J = 5.1$  Hz, **14**), 1.95 (m, 8 H, **11/15**), 1.61 (m, 2 H, **12**), 1.38 (m, 18 H, **16-18**), 0.80 (m, 9 H, **19**) ppm
- **$^{13}\text{C-NMR}$  ( $\text{CDCl}_3$ , 150.9 MHz):**  $\delta = 155.47, 141.41, 138.09, 137.90, 129.02, 128.69, 128.61, 128.09, 128.00, 127.89, 127.81, 127.64, 127.44, 126.85, 99.44, 71.25, 71.03, 65.79, 63.16, 36.77, 35.71, 35.04, 32.74, 32.70, 31.41, 30.64, 28.71, 26.17, 23.23, 14.65$  ppm
- **MS (ESI):**  $m/z = 1478.81$   $[\text{MH}]^+$ , 1499.79  $[\text{MNa}]^+$



## TBDMS Resorcinarene (4):

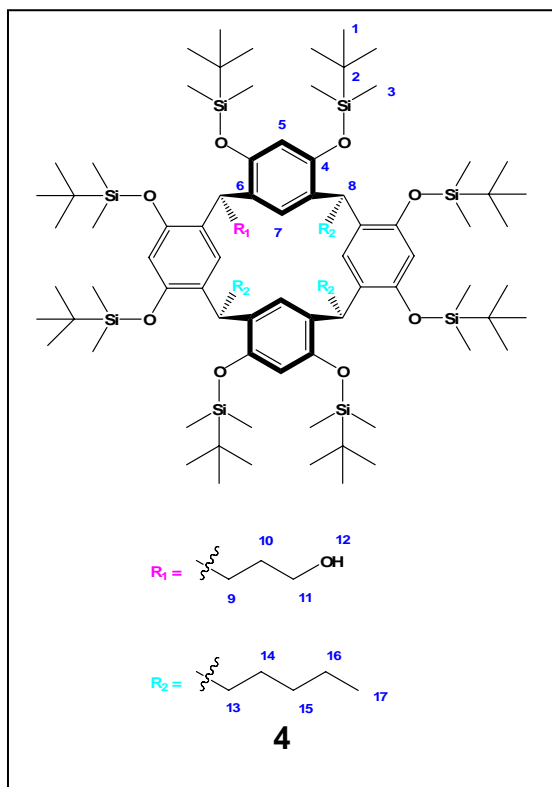

To a solution of **3** (2.21 g, 1.23 mmol) in  $\text{CH}_2\text{Cl}_2$  (50 ml) and MeOH (50 ml) was added a solution of  $\text{I}_2$  (60 mg, 0.24 mmol) in MeOH (6 ml). The reaction mixture was stirred for 5 hours at room temperature, after which  $\text{Na}_2\text{S}_2\text{O}_3$  (300 mg) was added resulting in a colorless solution.  $\text{CH}_2\text{Cl}_2$  (100 ml) was added, the mixture was filtered and the filtrate was concentrated *in vacuo*.

Purification of the mono hydroxy TBDMS resorcinarene **4** was achieved by flash chromatography (silica) using a hexanes/ $\text{CH}_2\text{Cl}_2$  1:0 to 2:1 gradient.

- **Yield:** 1.41 g (69 %)
- **Symmetry:**  $C_1$
- **$^1\text{H-NMR}$  ( $\text{CDCl}_3$ , 600 MHz):**  $\delta = 7.13/7.12$  („d“, 2 H, **7**),  $6.34/6.33$  („d“, 2 H, **7**),  $6.24/6.22$  („d“, 2 H, **5**),  $6.11/6.10$  („d“, 2 H, **5**),  $4.40$  (m, 4 H, **8**),  $3.56$  (m, 2 H, **11**),  $2.04$  („t“, 1 H, **12**),  $1.93$  (m, 4 H, **10**),  $1.73$  (m, 4 H, **9/13**),  $1.50$  (m, 4 H, **9/13**),  $1.21$  (m, 18 H, **14-16**),  $1.09$  (s, 36 H, **1**),  $0.83$  (m, 9 H, **17**),  $0.37$  (s, 24 H, **3**),  $0.06$  (s, 12 H, **3**),  $-0.14$  (s, 12 H, **3**) ppm
- **$^{13}\text{C-NMR}$  ( $\text{CDCl}_3$ , 150.9 MHz):**  $\delta = 152.89, 152.73, 152.70, 151.22, 151.10, 151.04, 129.81, 129.56, 129.54, 129.43, 129.40, 128.98, 126.66, 126.55, 124.34, 124.15, 124.12, 123.58, 110.62, 110.50, 107.90, 107.86, 64.03, 53.83, 38.10, 38.02, 37.56, 36.21, 36.11, 33.04, 32.99, 32.50, 31.89, 29.23, 26.55, 23.40, 23.36, 18.91, 18.89, 18.87, 18.73, 14.69, -3.27, -3.28, -3.31, -3.46, -3.48, -3.55, -3.57$  ppm
- **MS (ESI-high acc.):**  $m/z = 1670.12$   $[\text{MH}]^+$ ,  $1692.10$   $[\text{MNa}]^+$

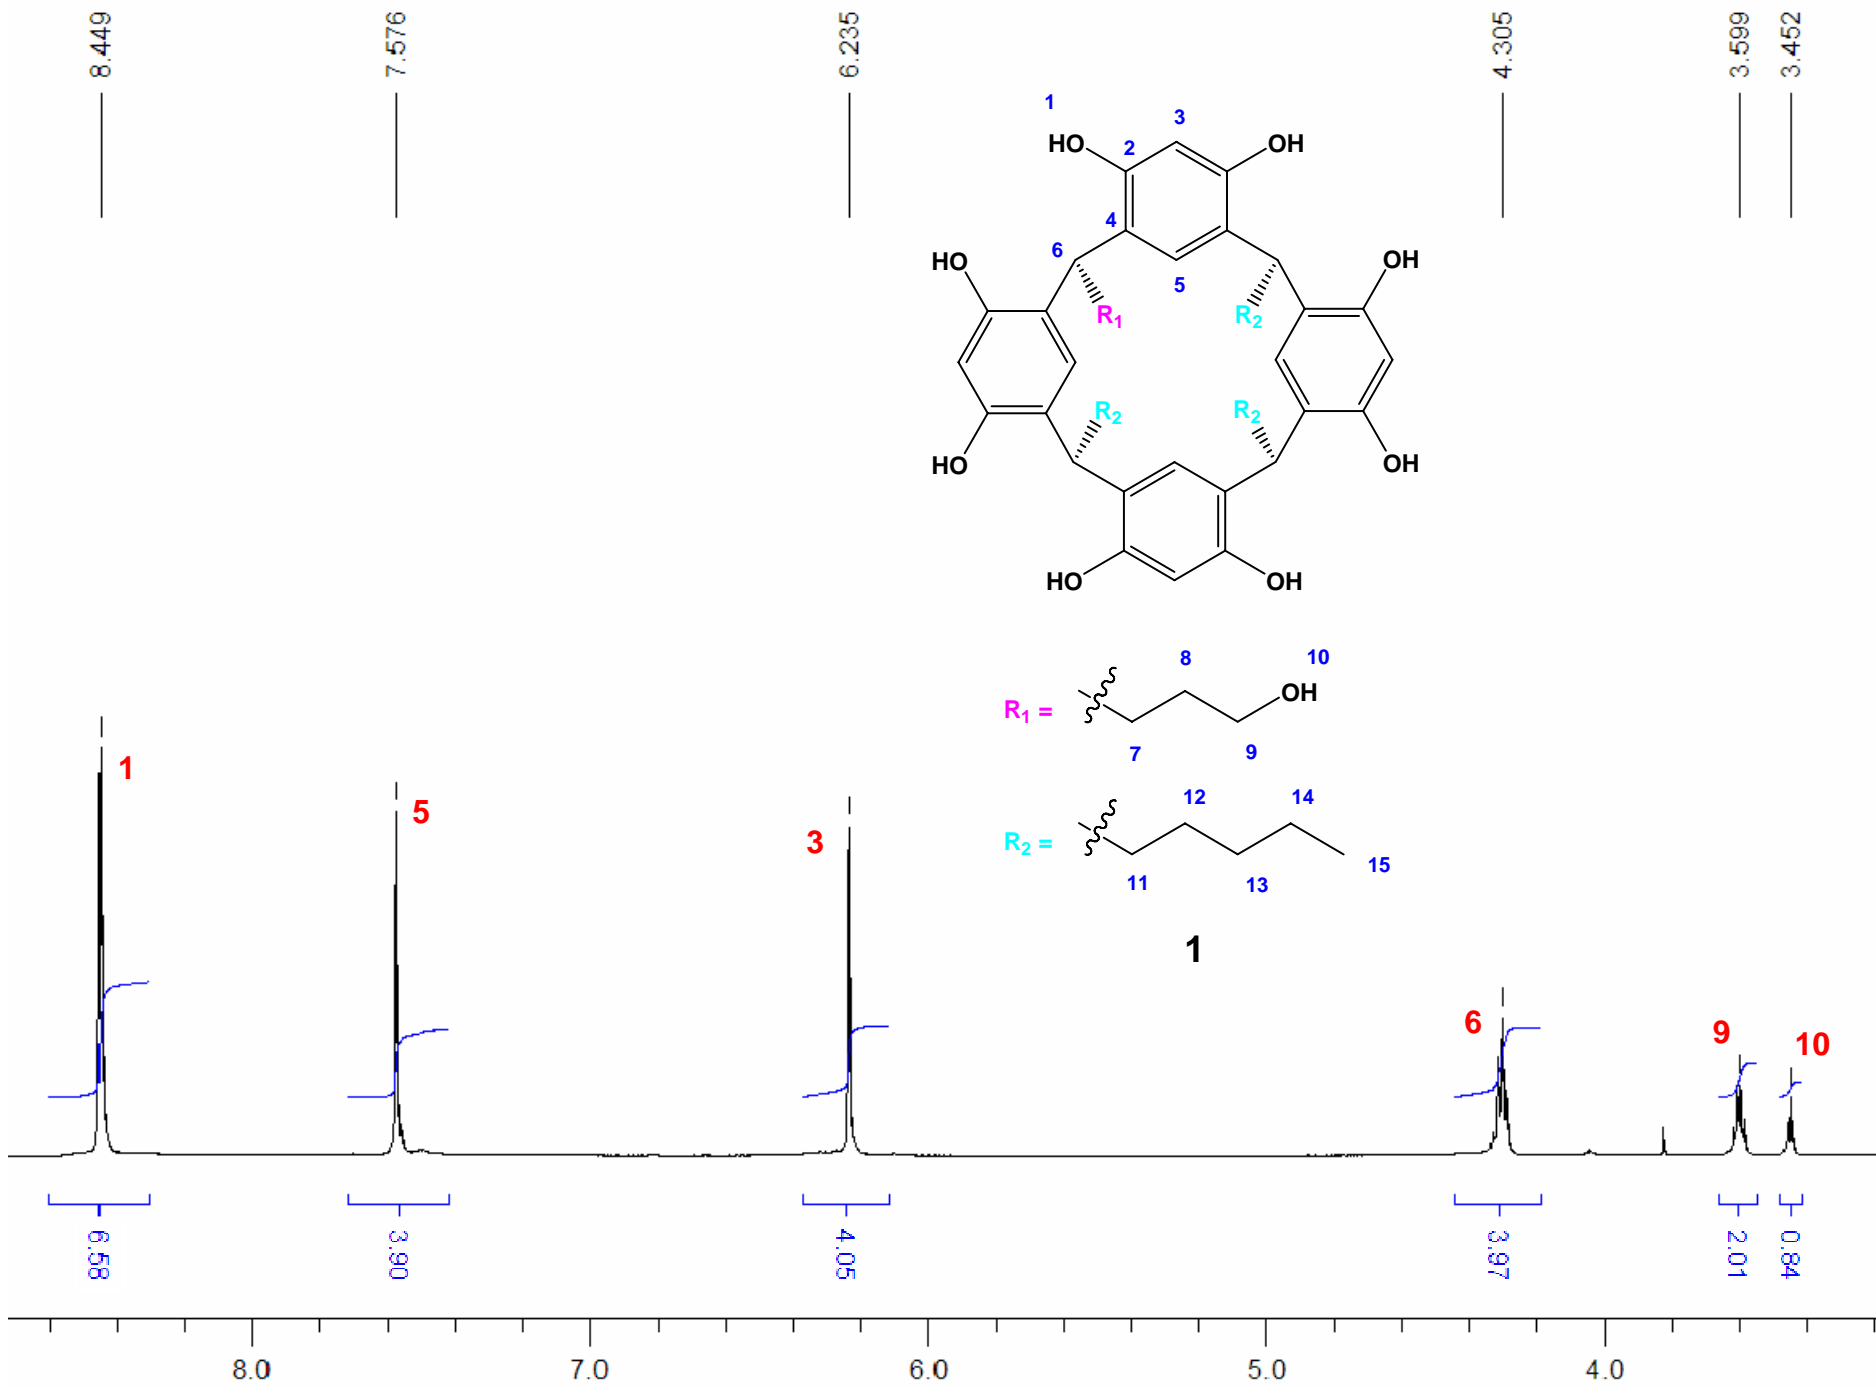

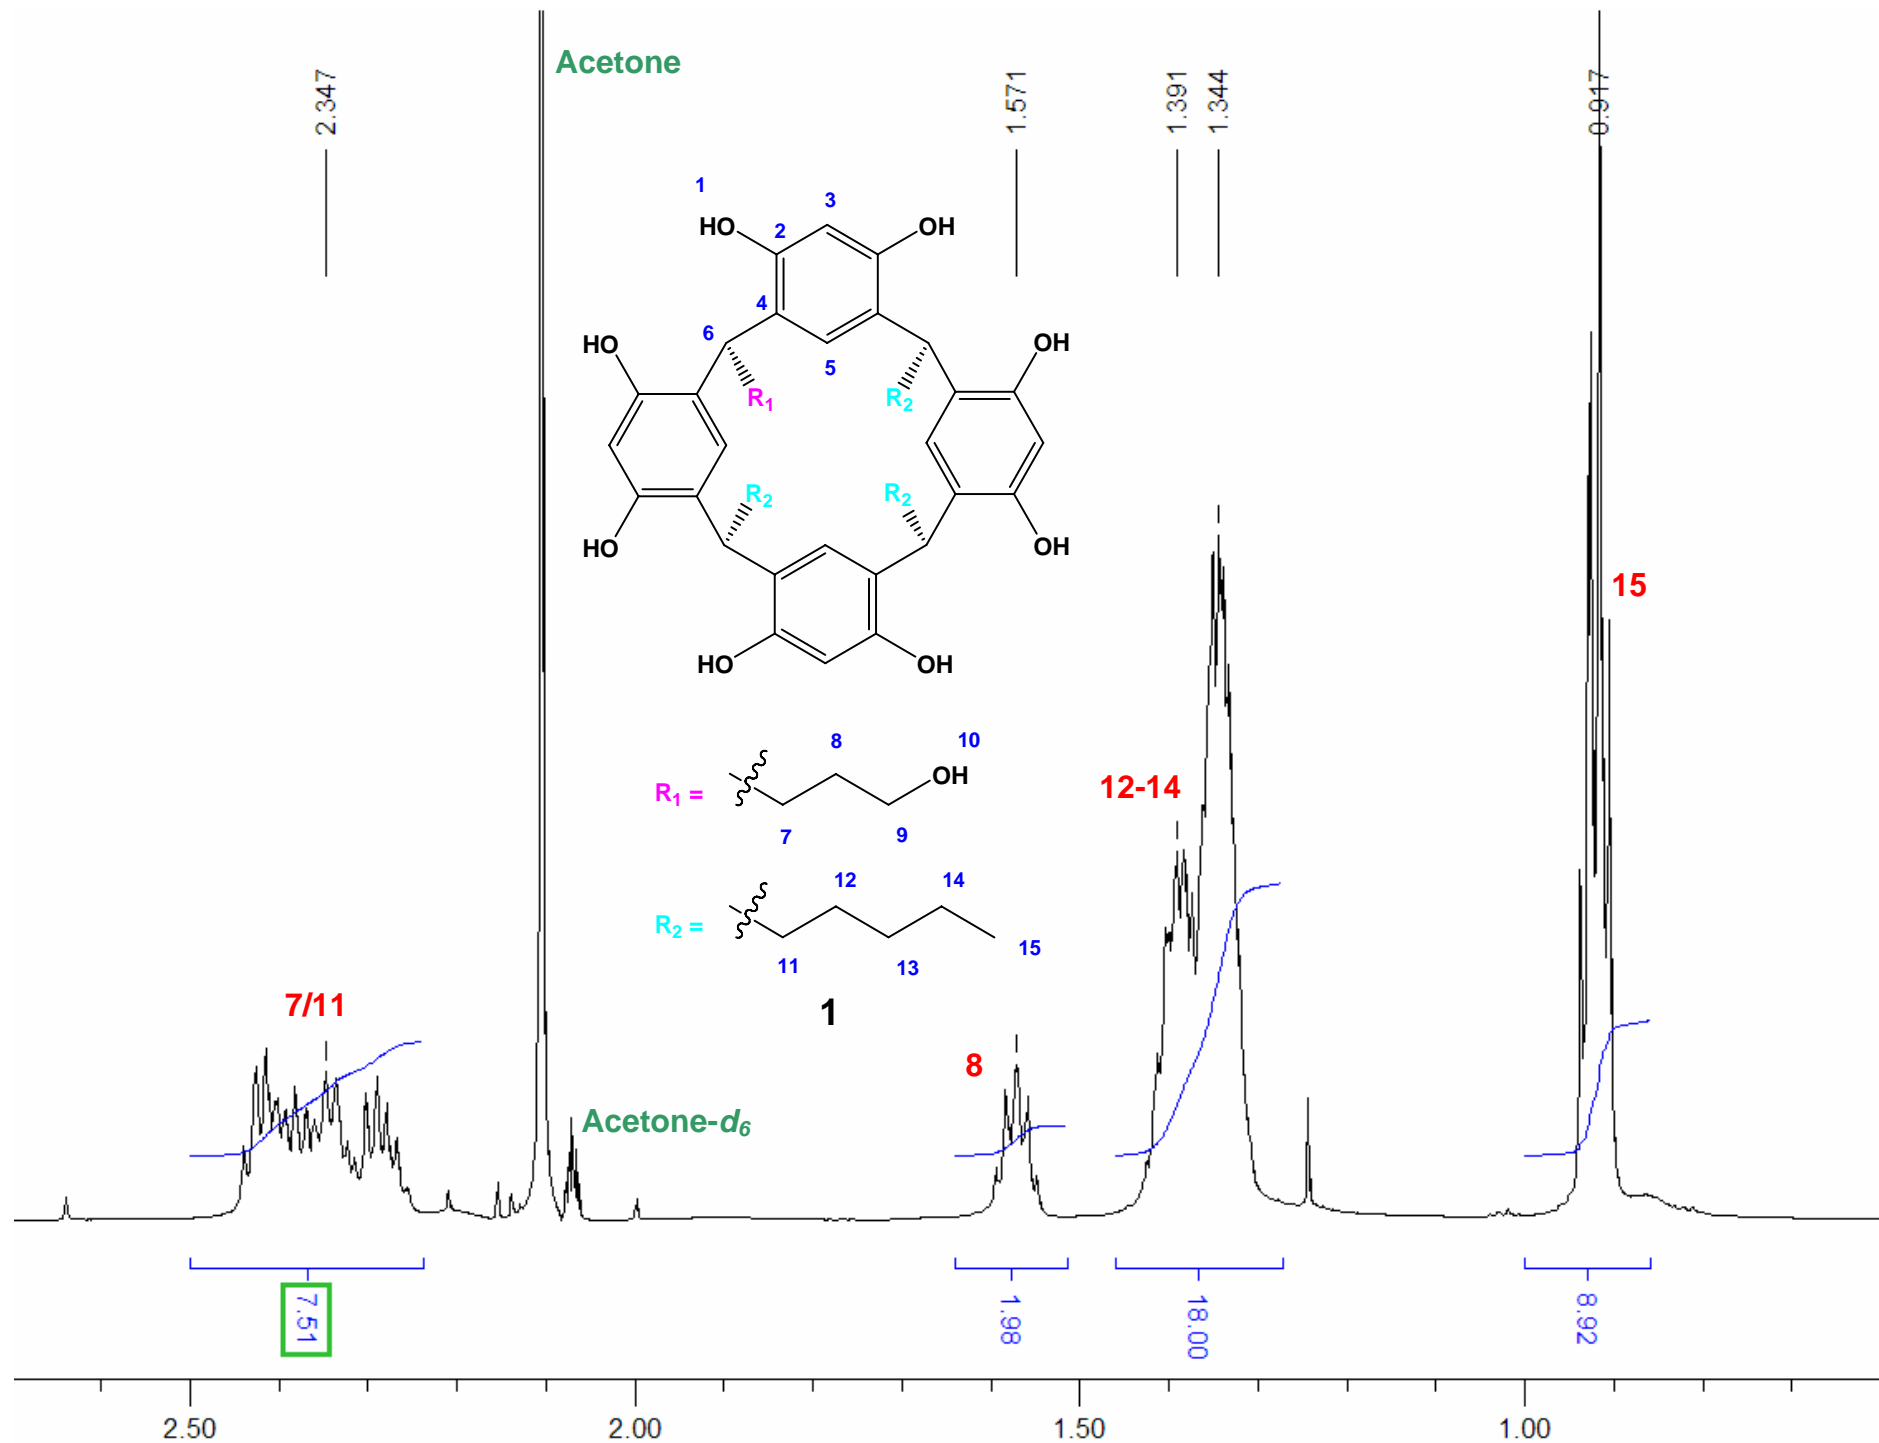

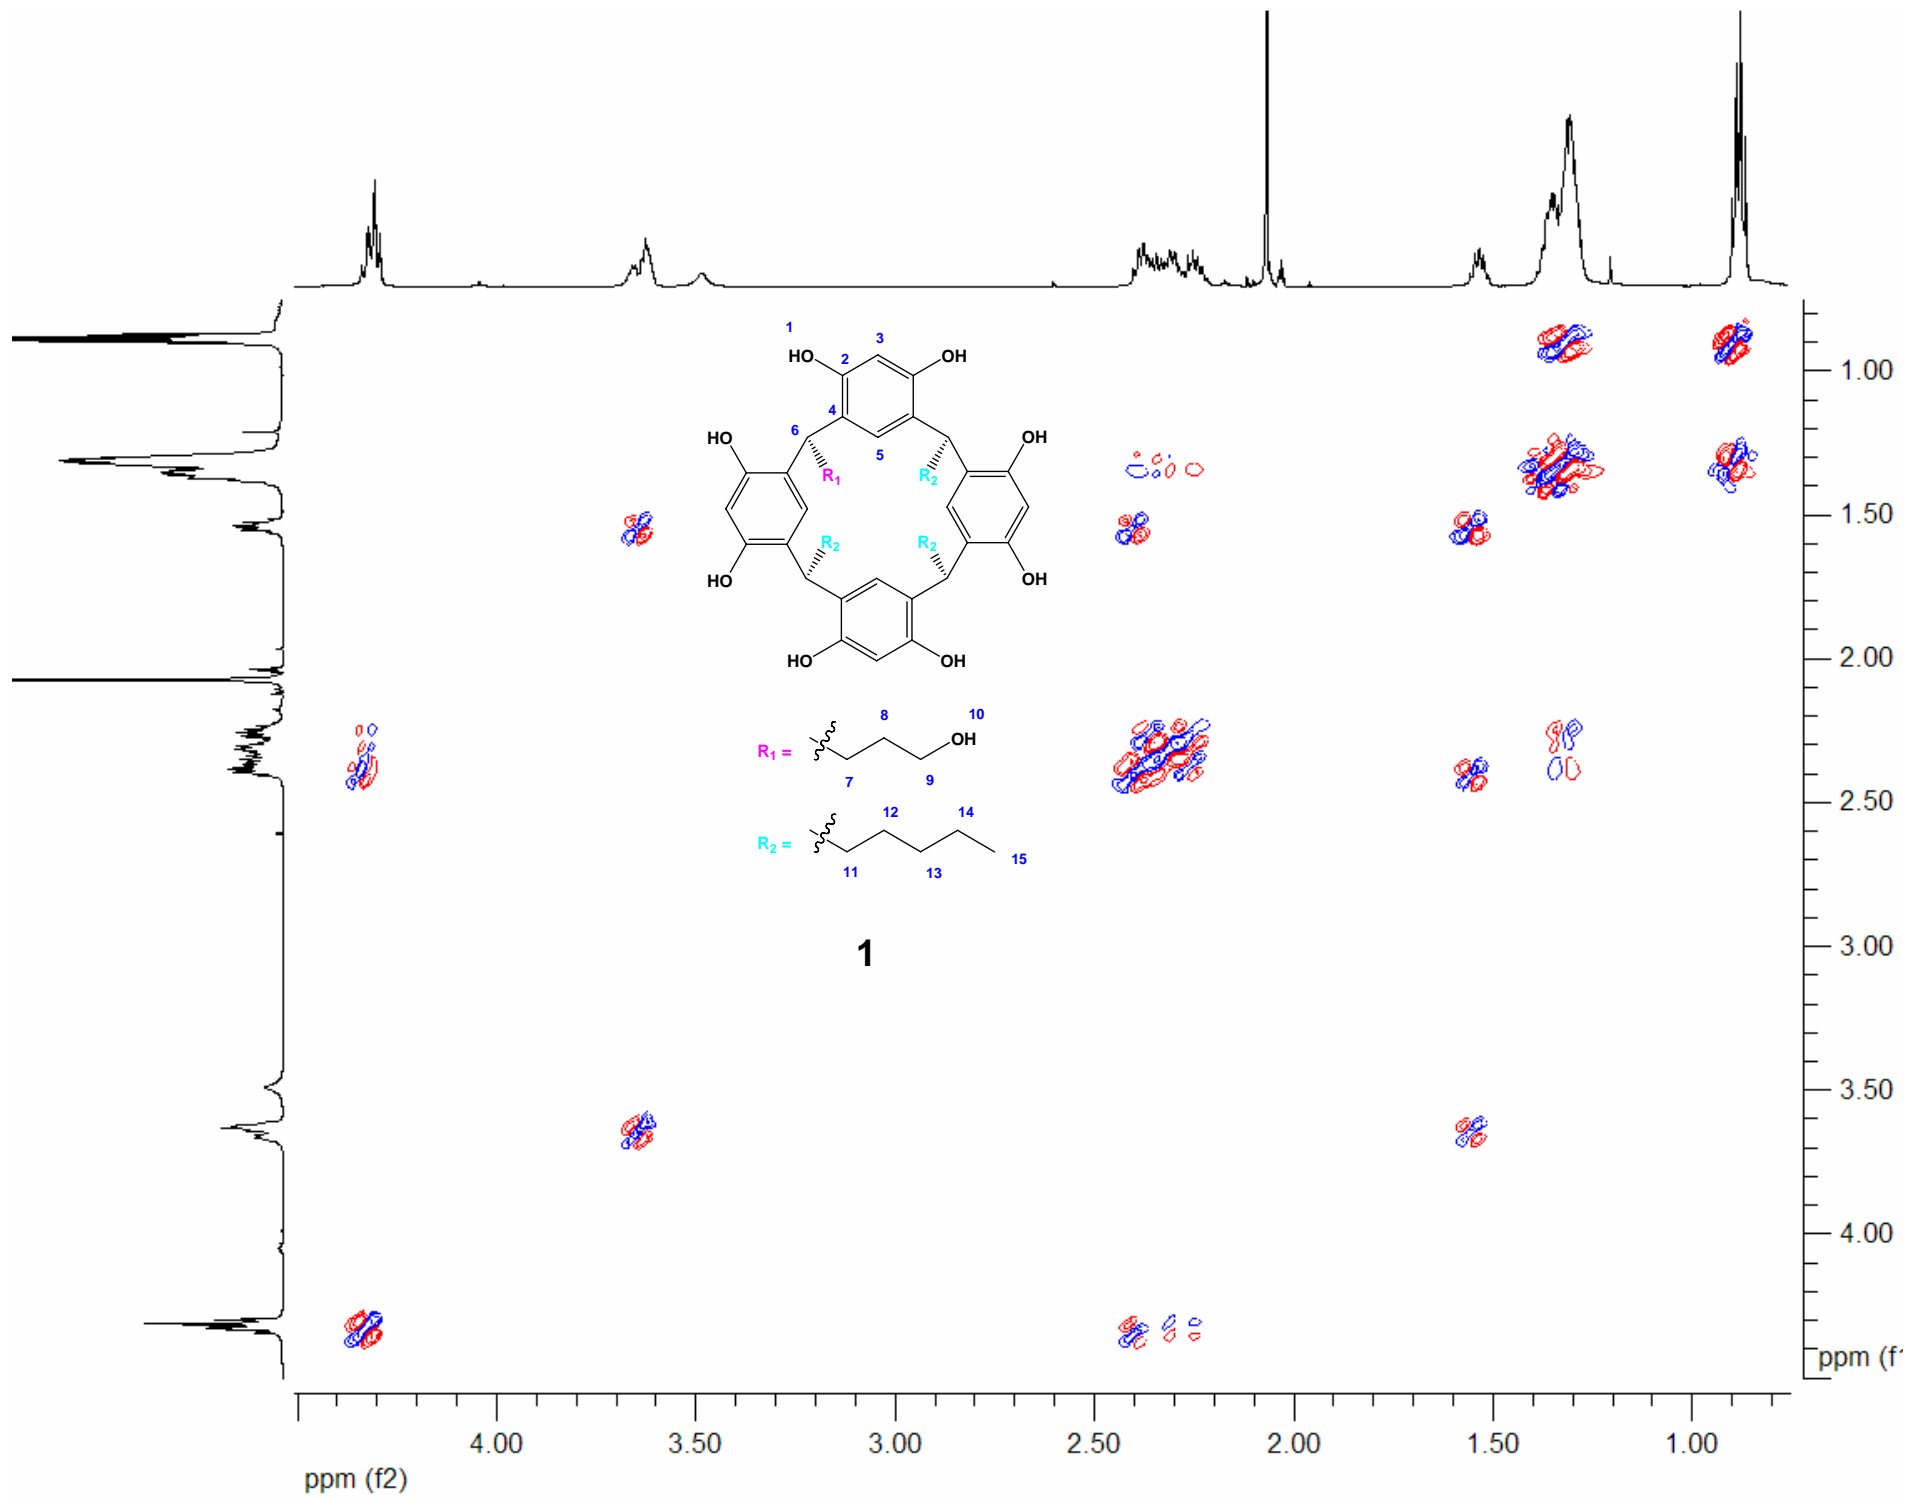

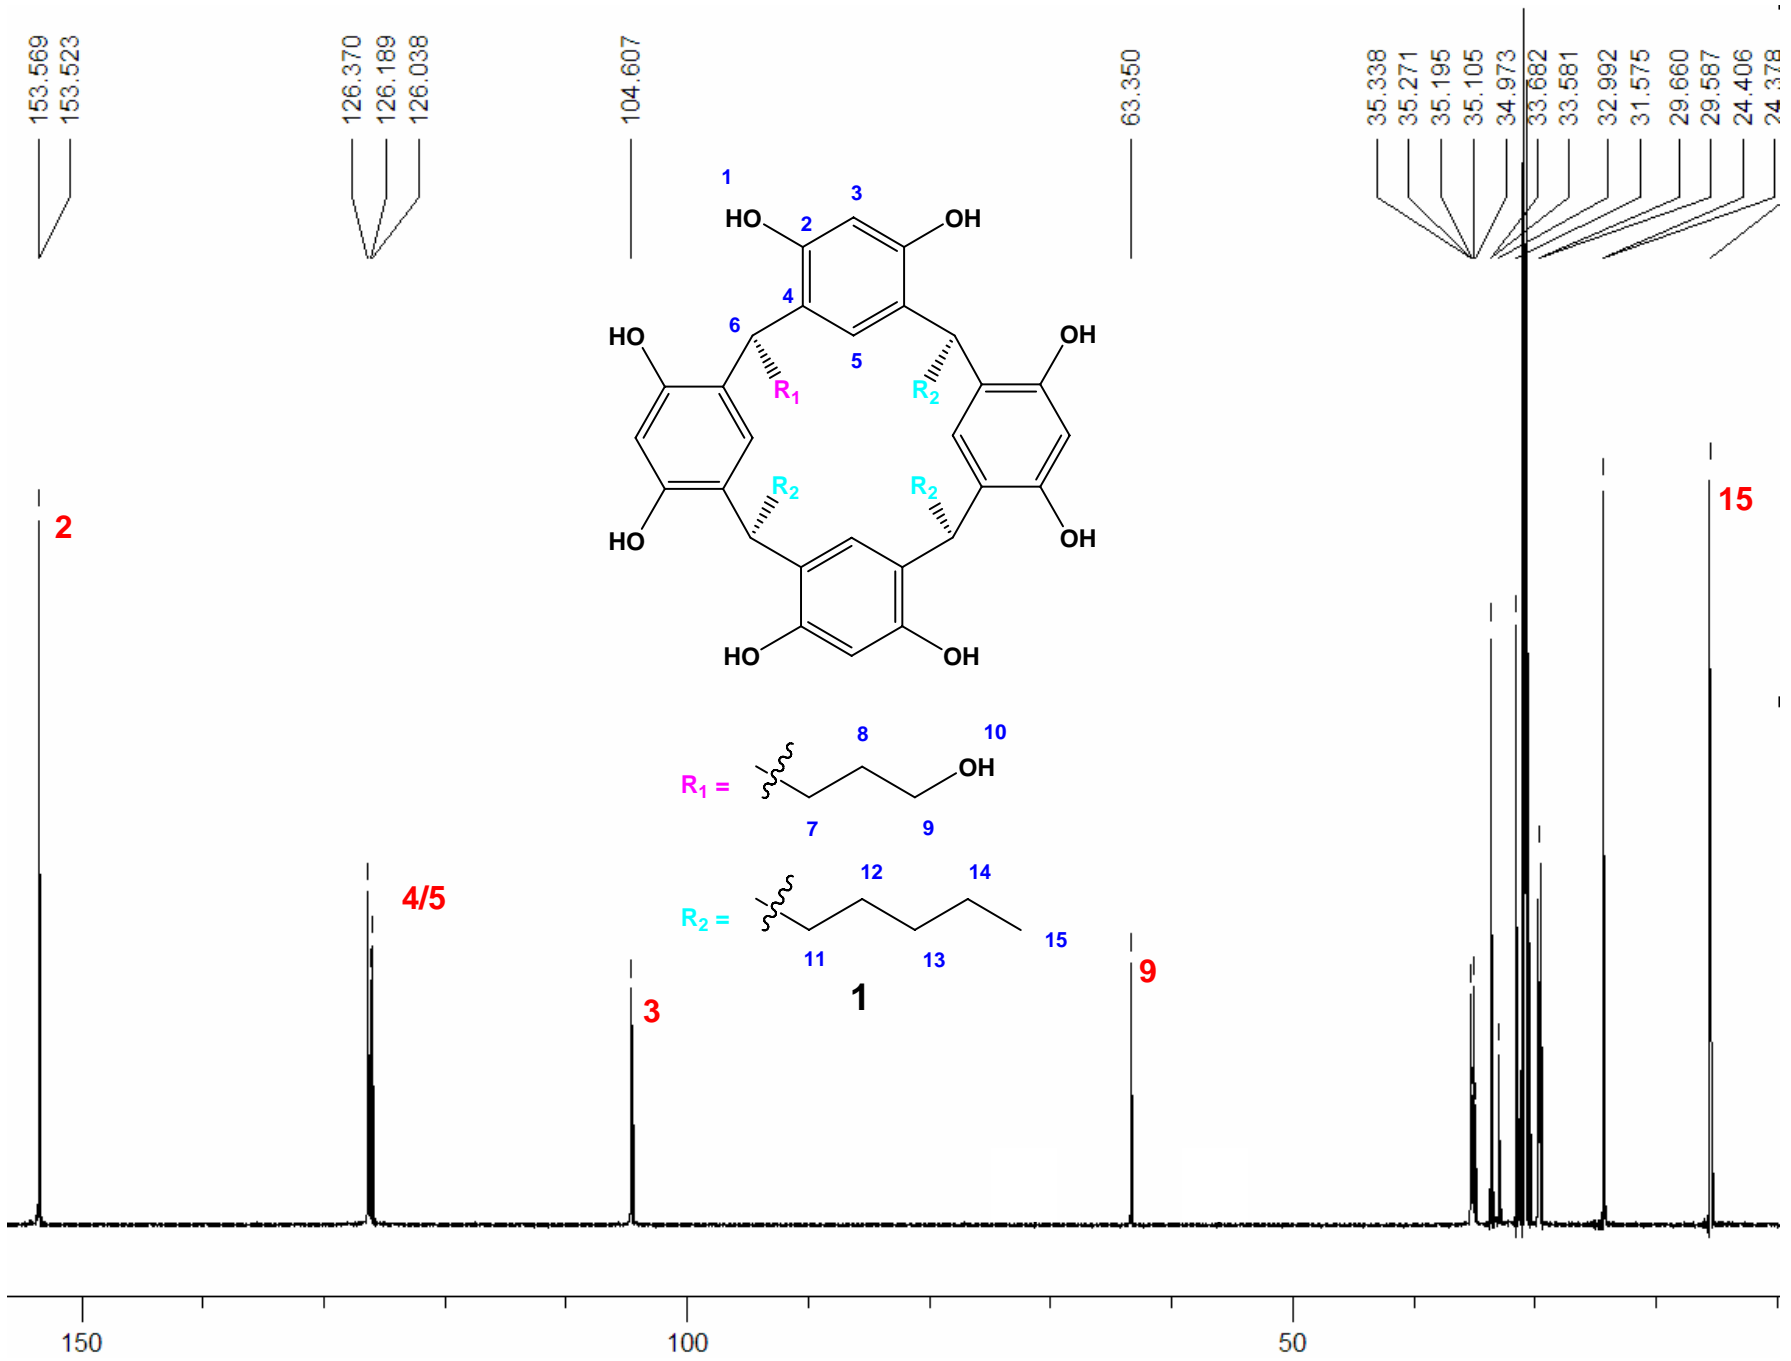



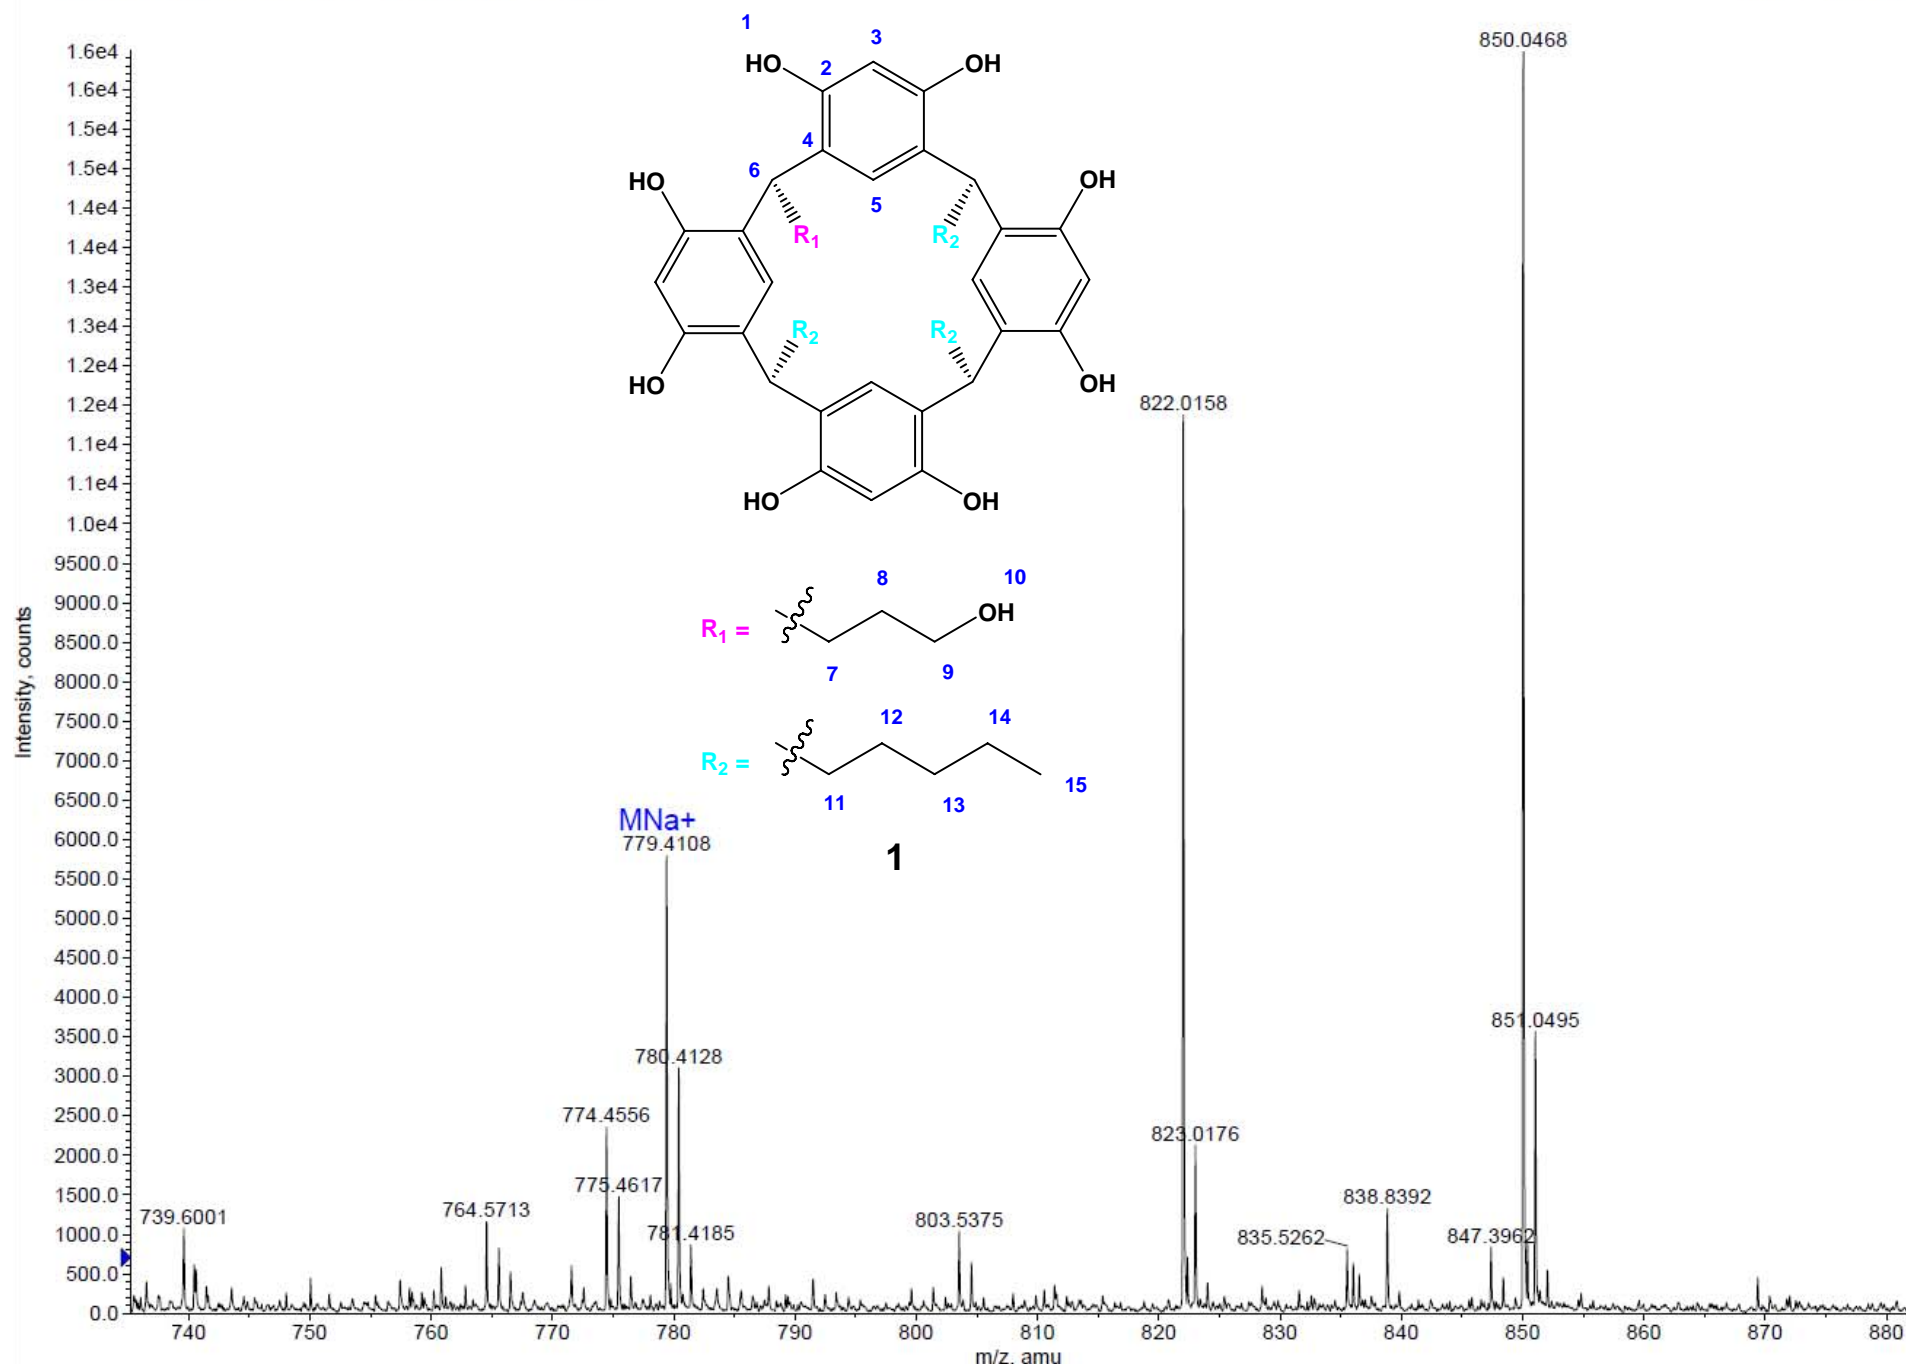

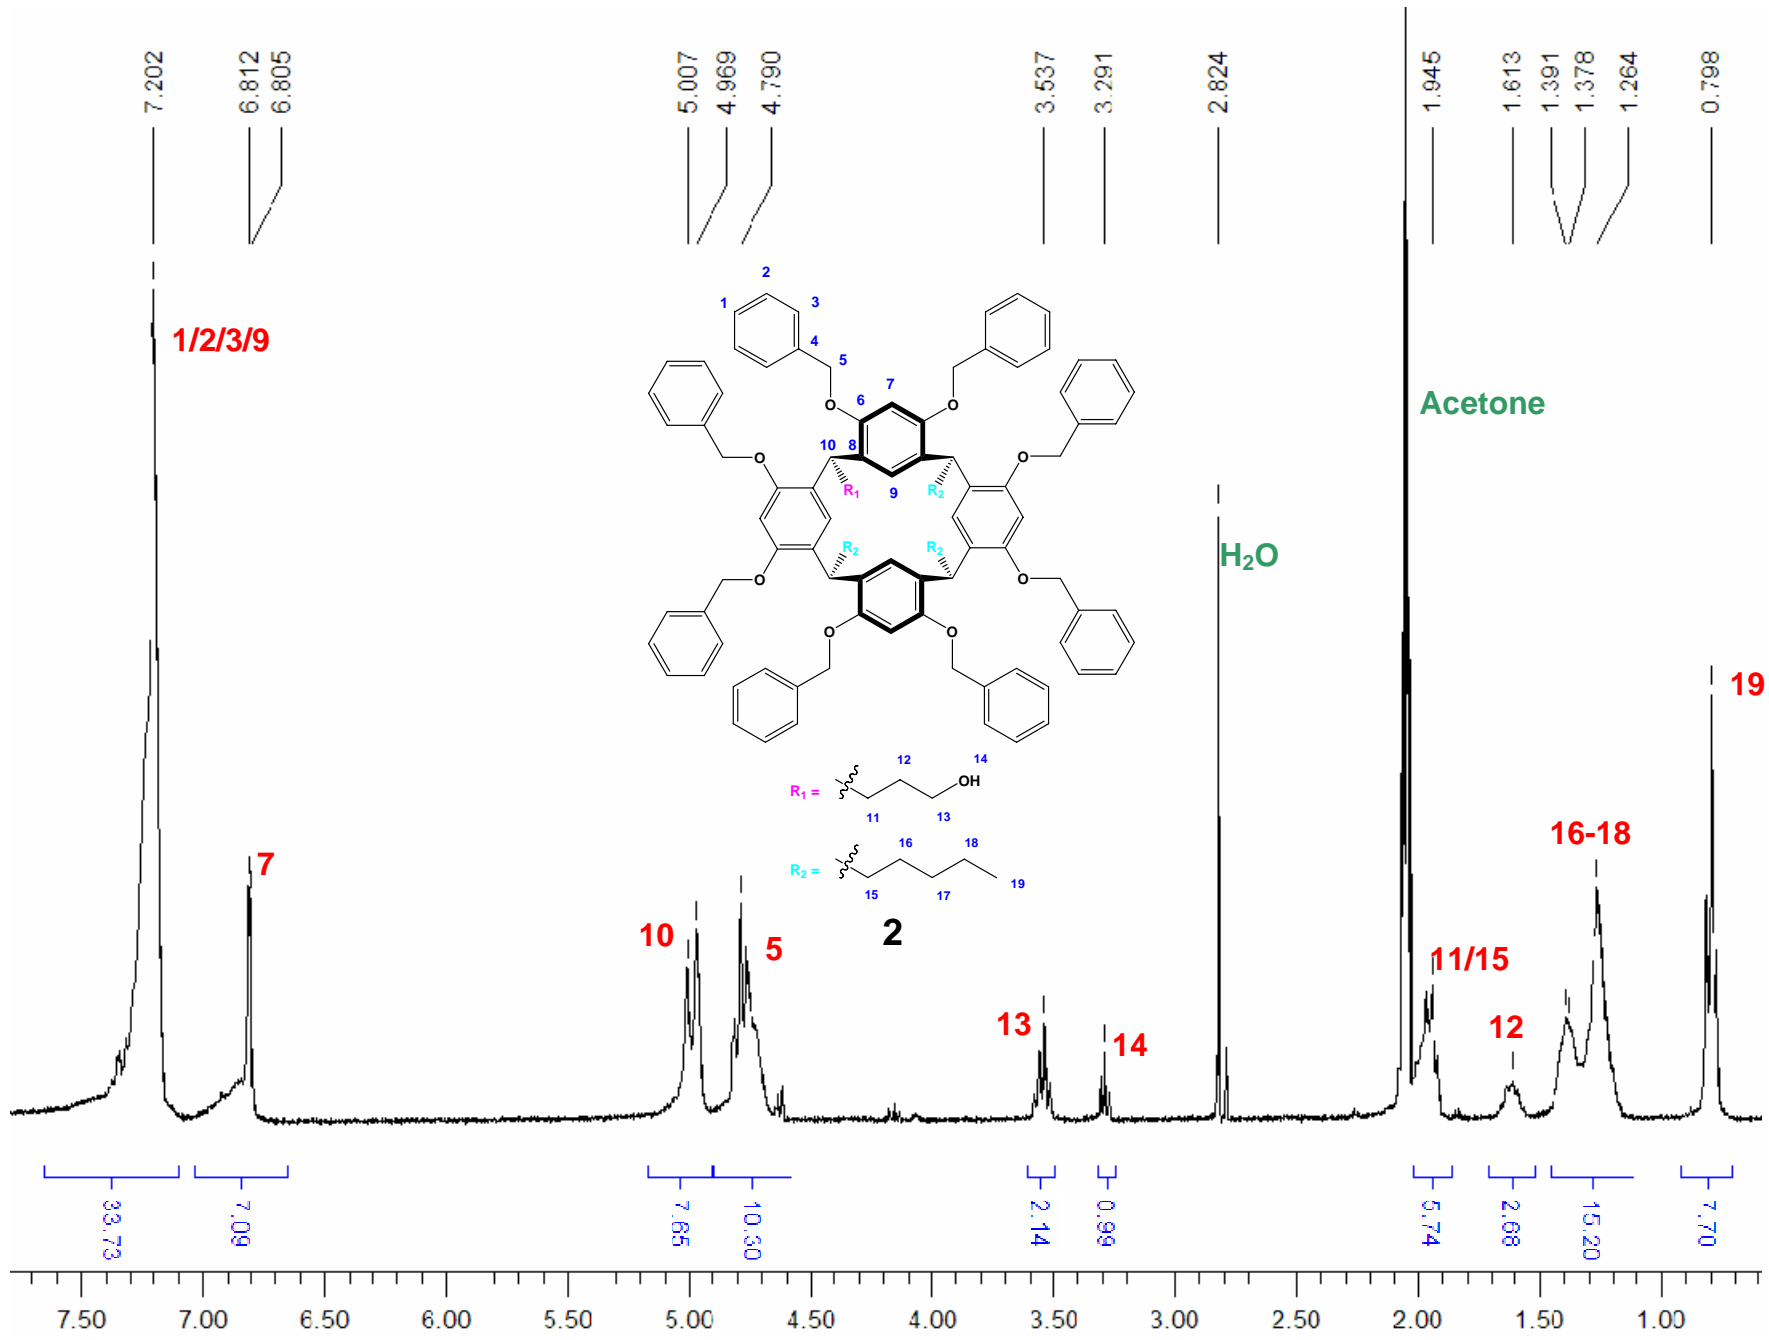

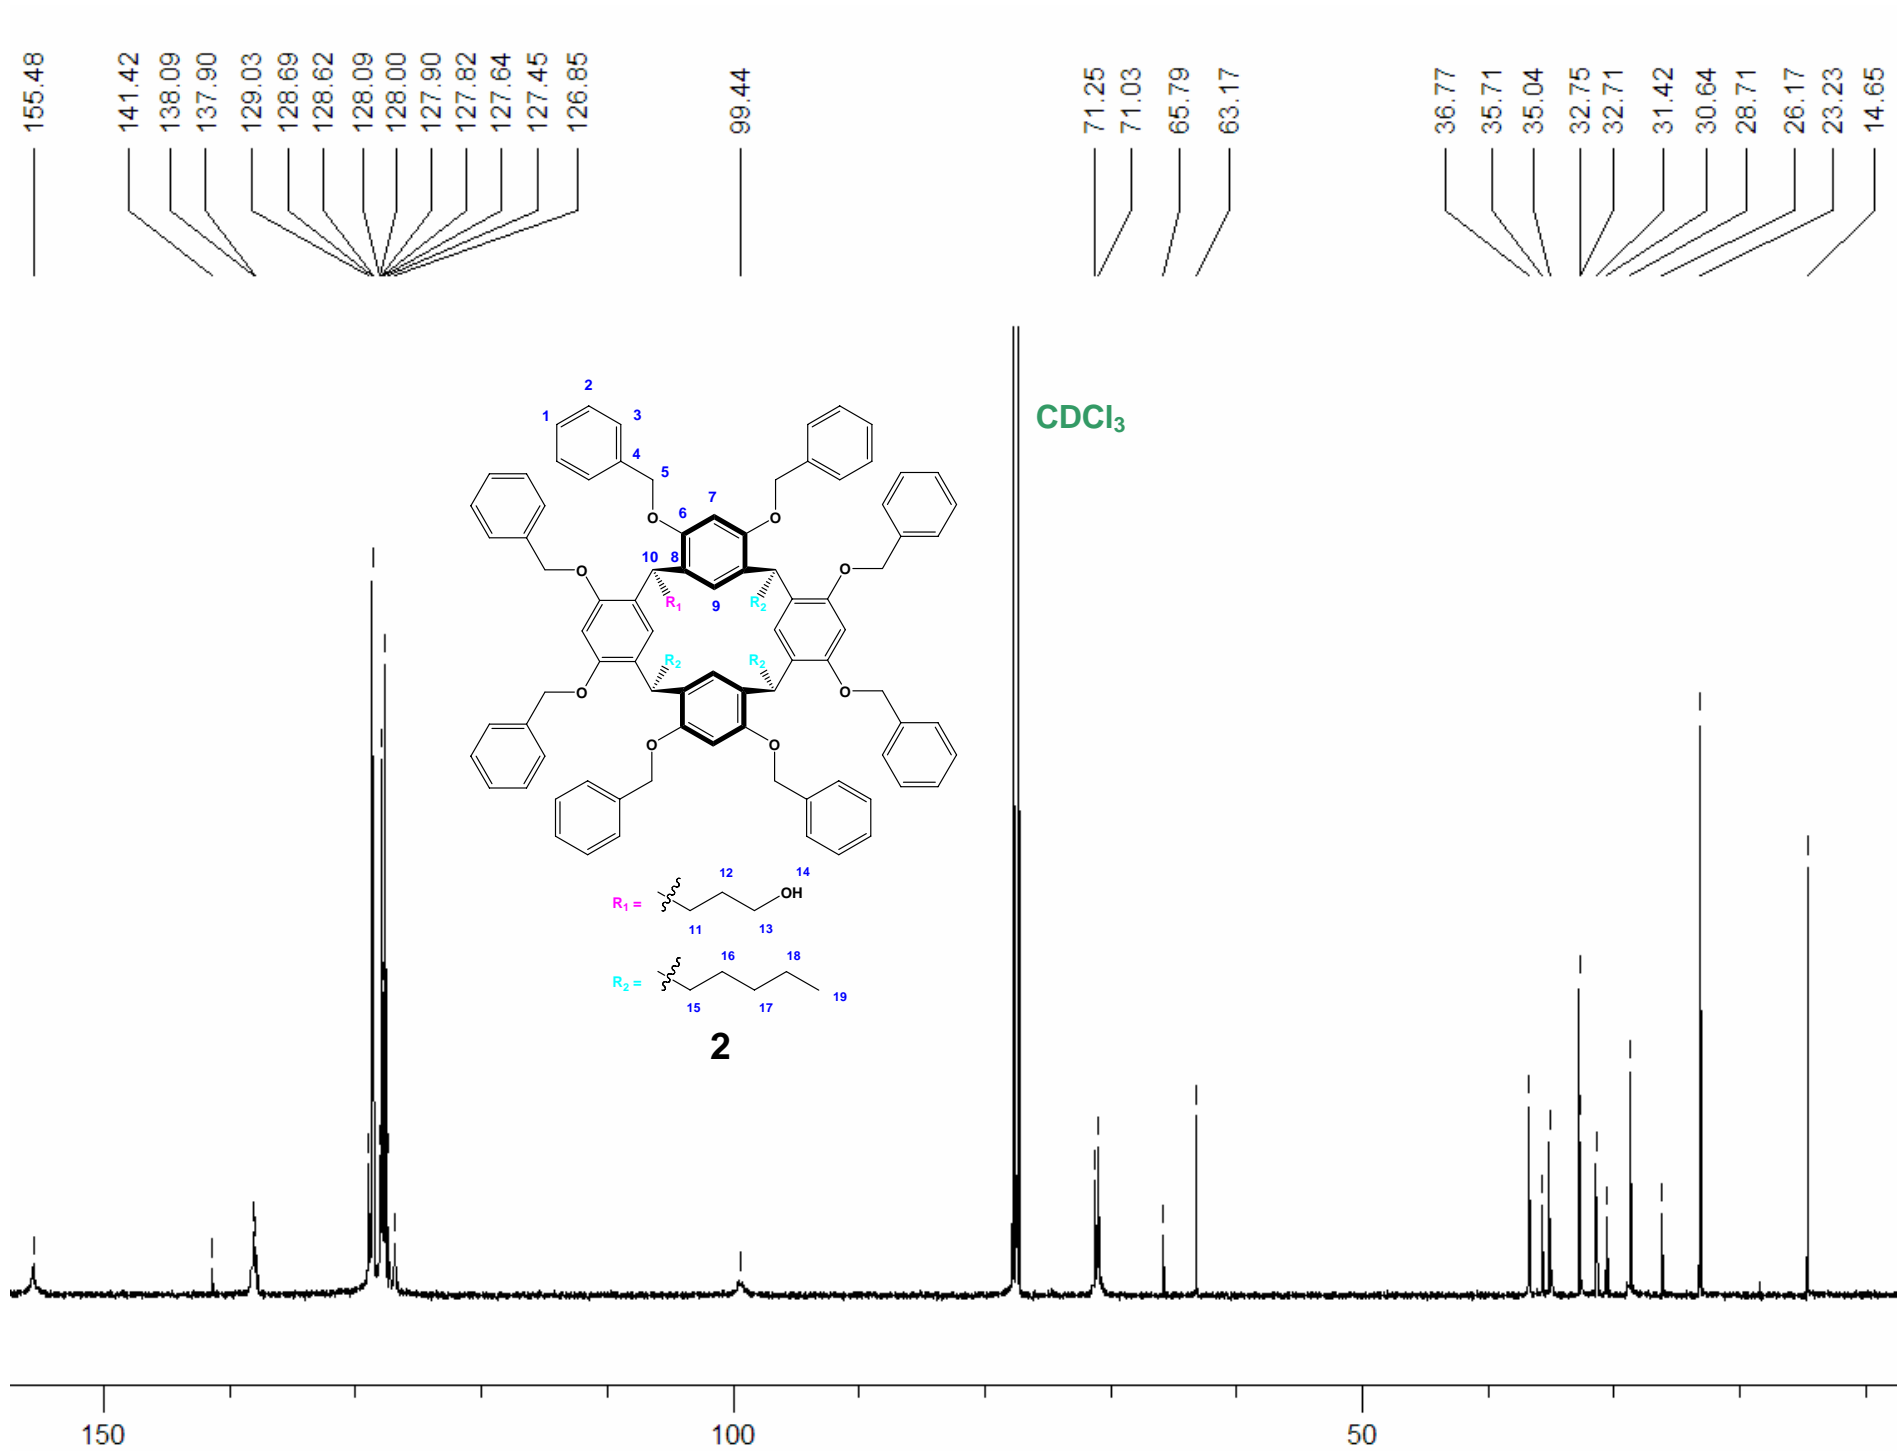

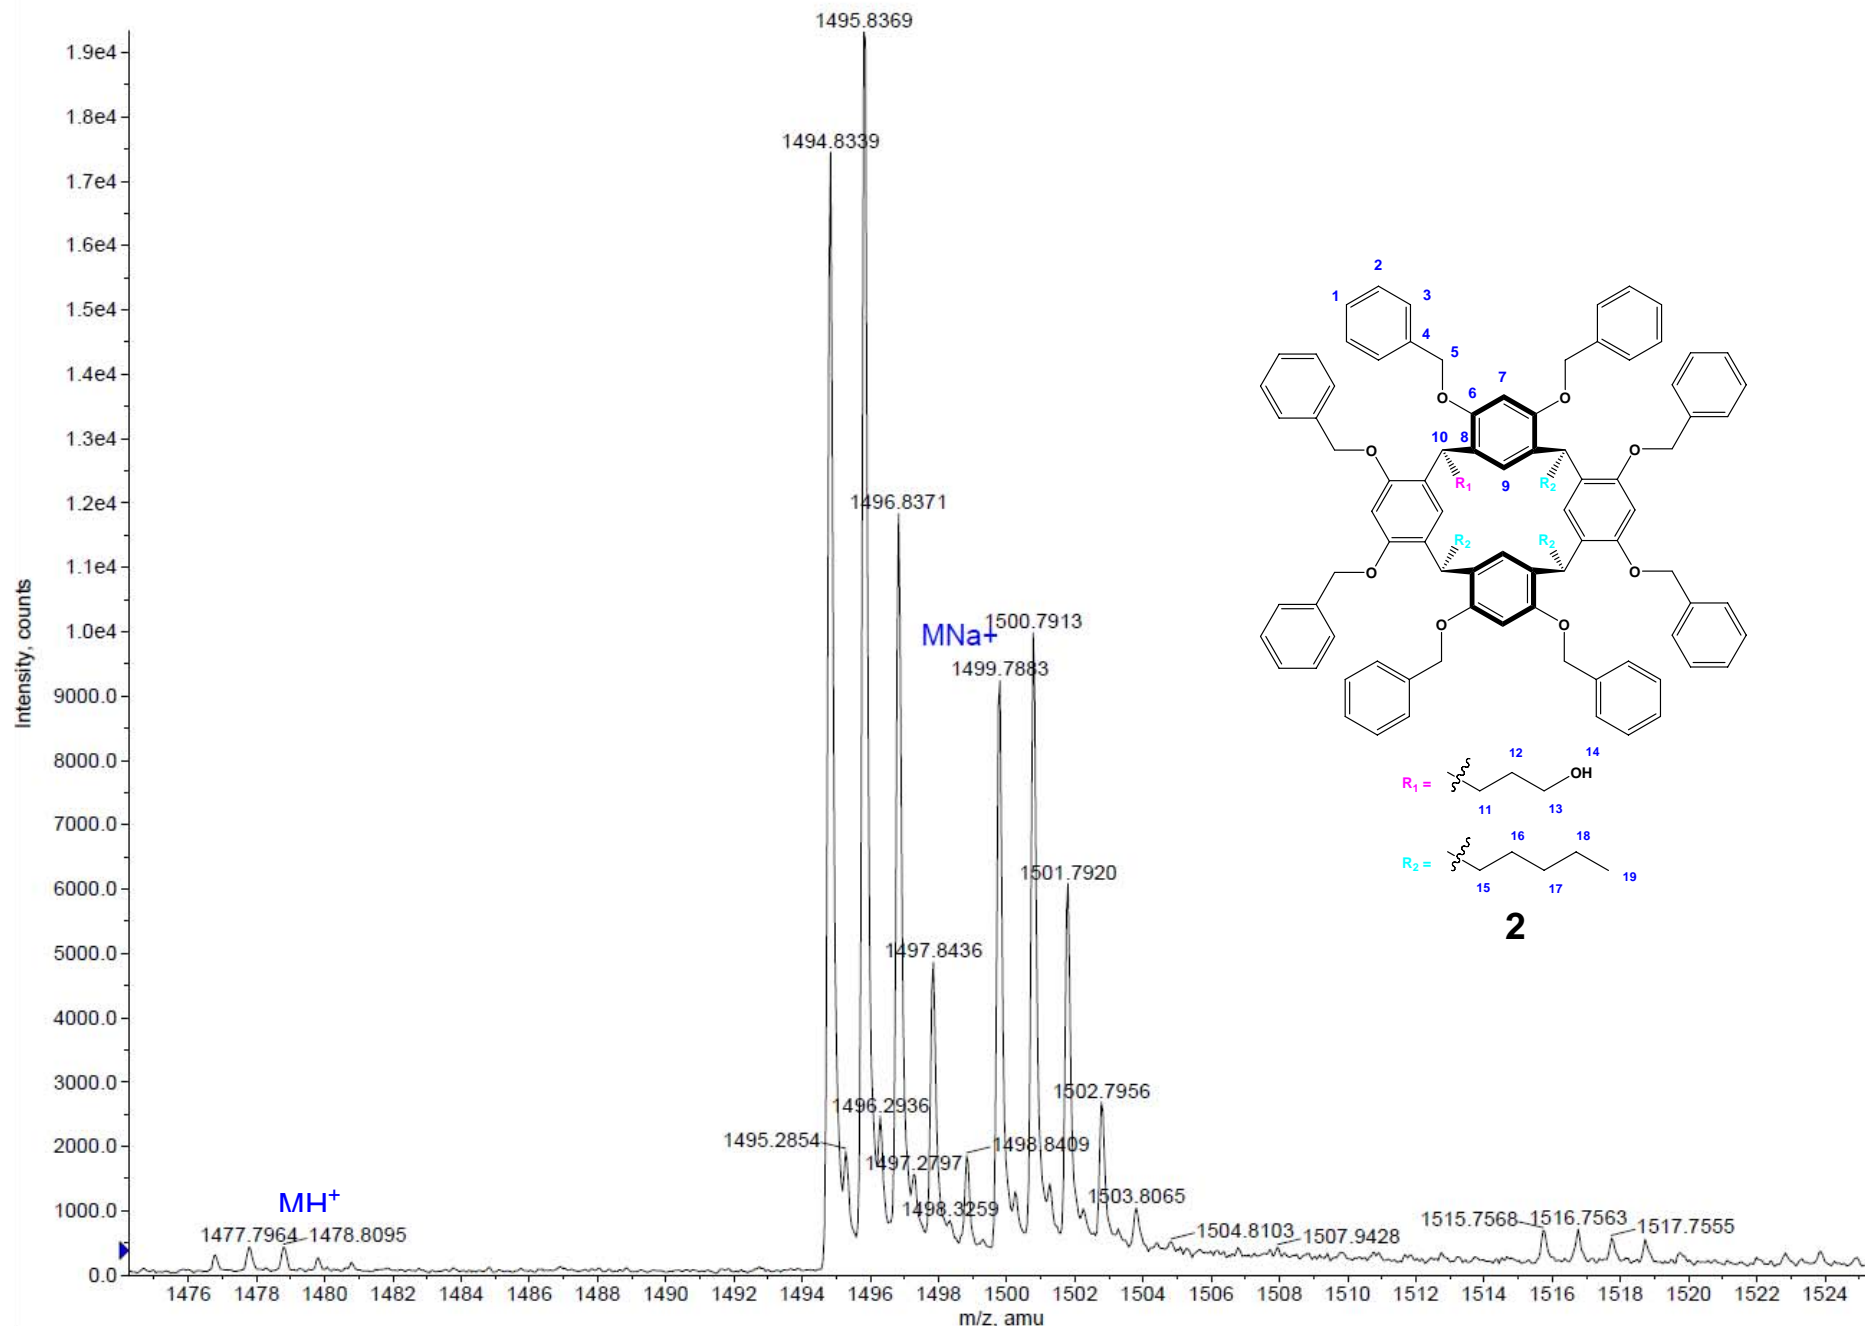

7.136  
7.122

6.331  
6.242  
6.230  
6.098

4.402  
4.380  
4.359

3.521

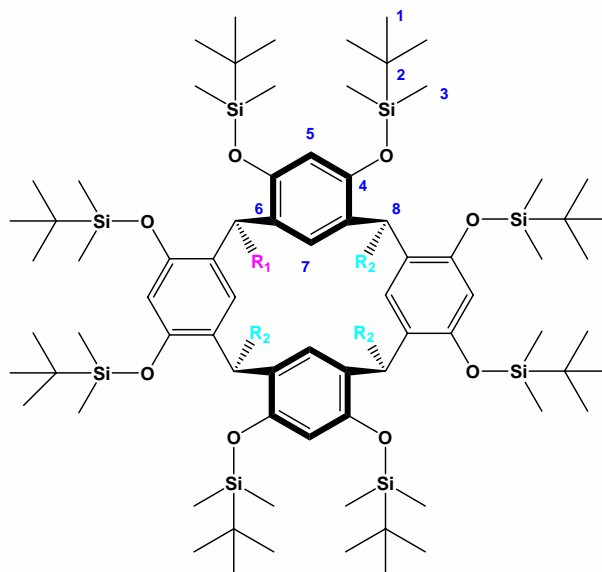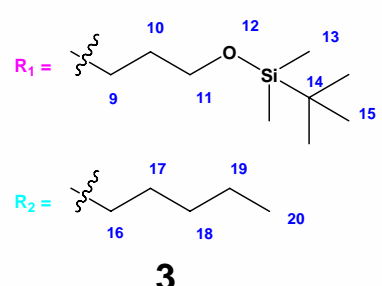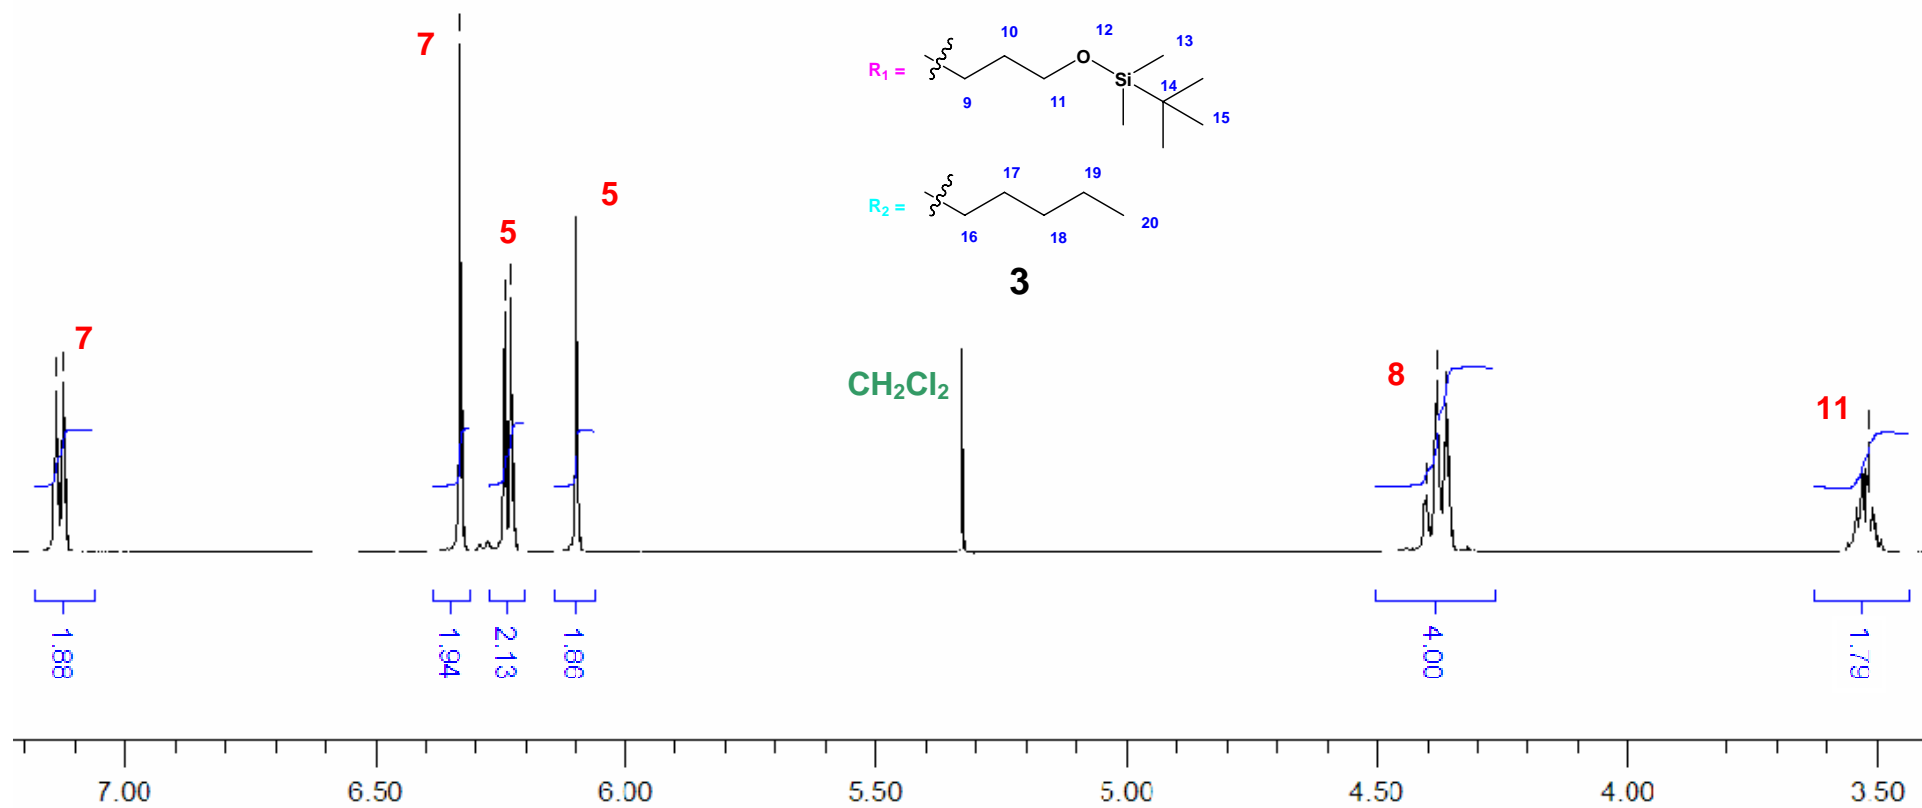

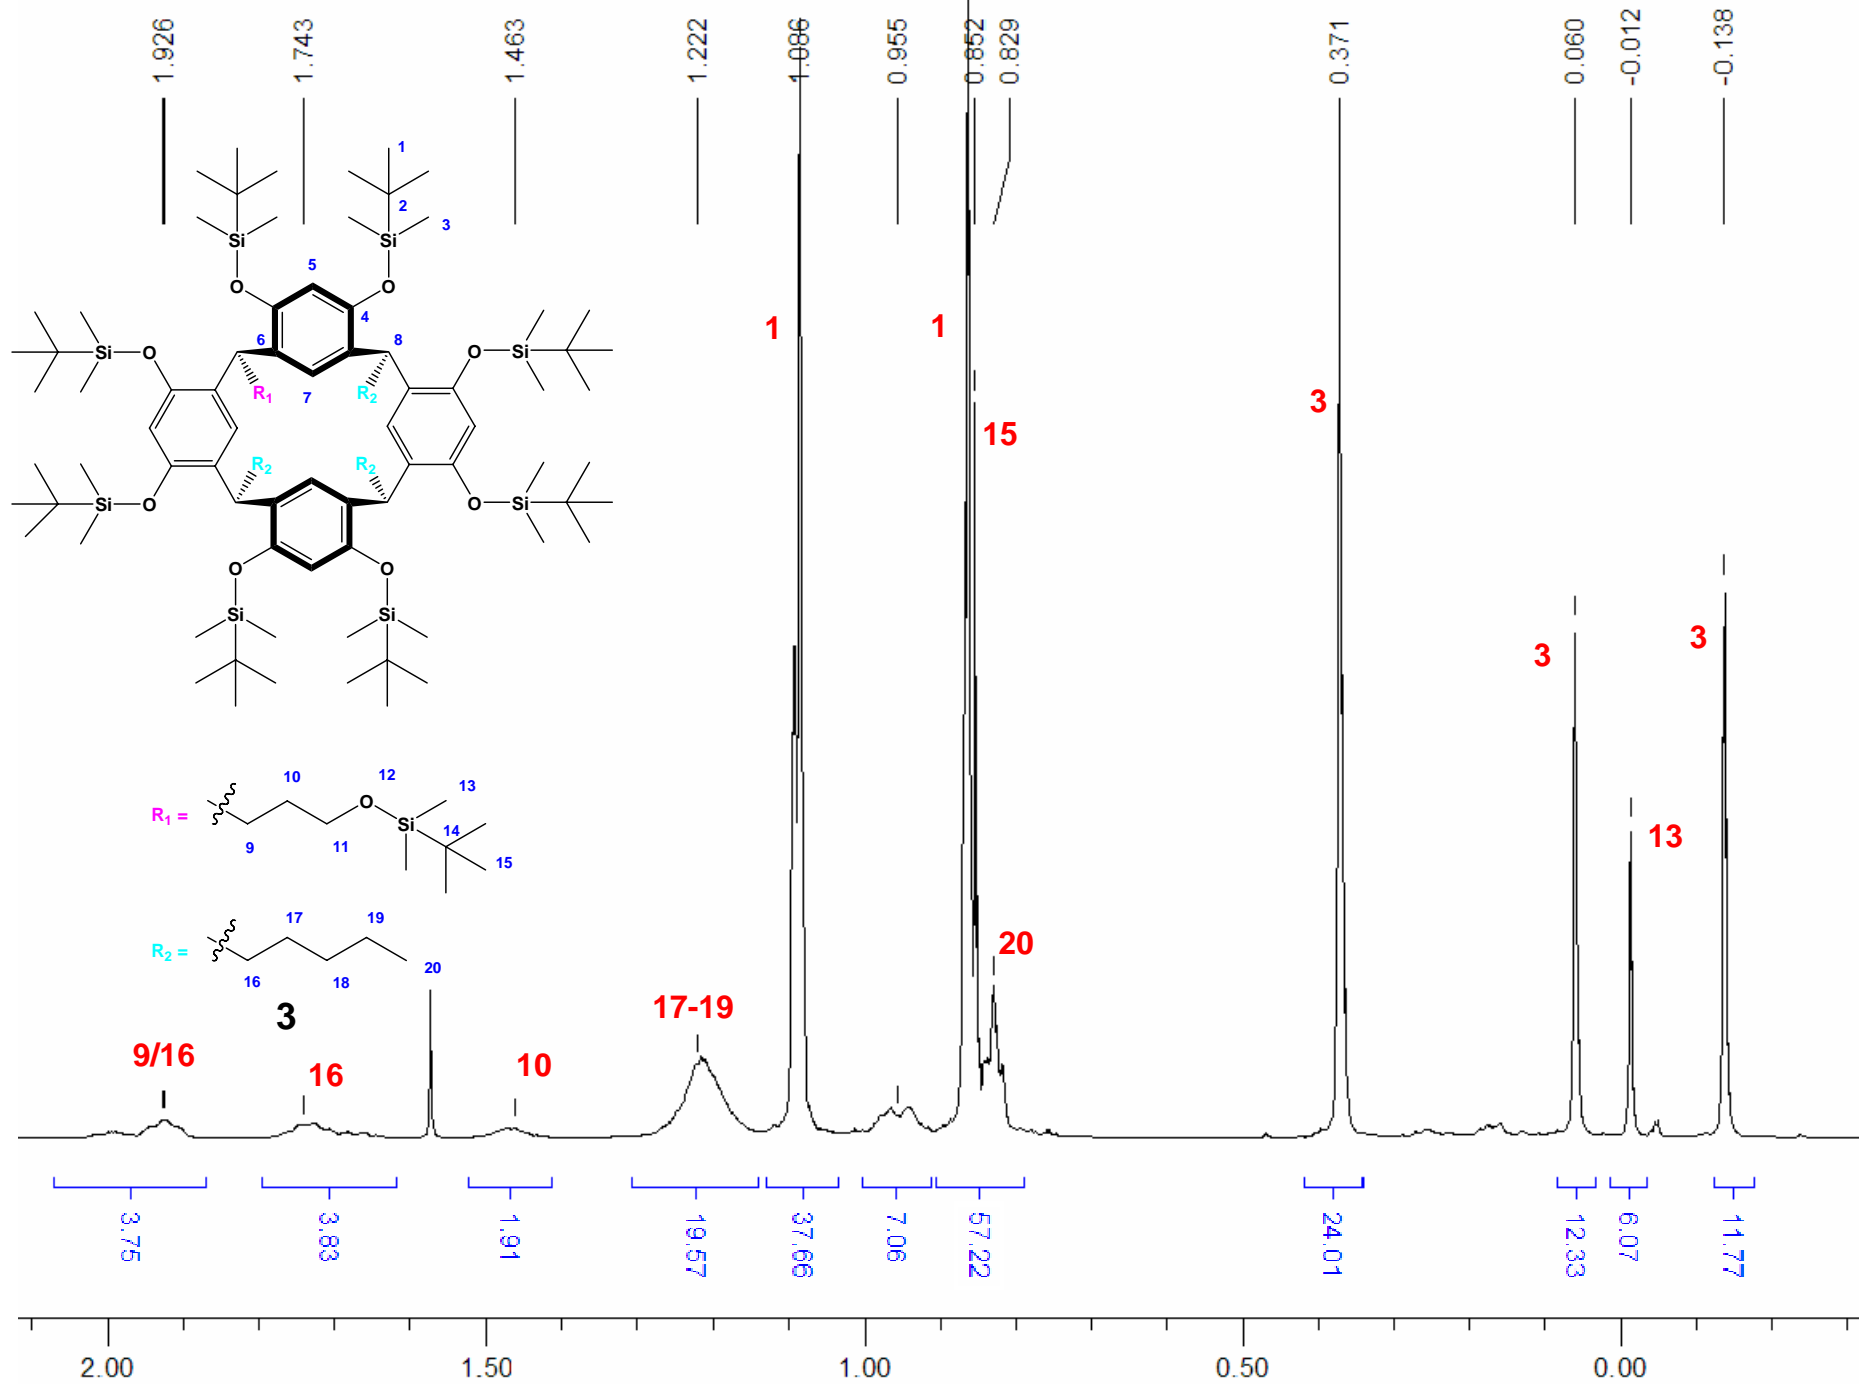

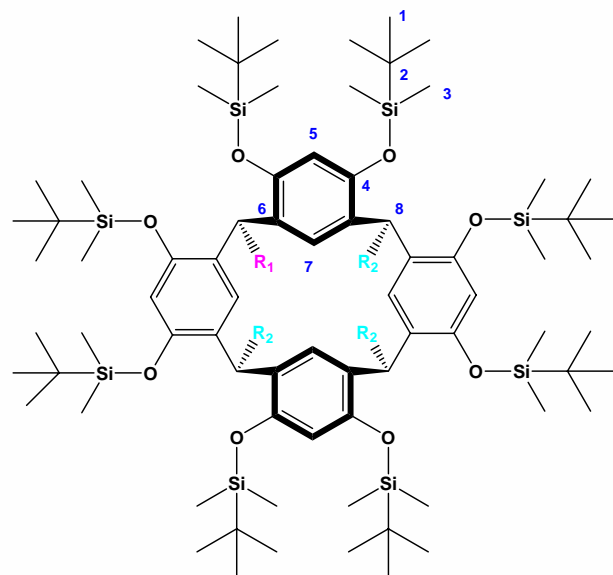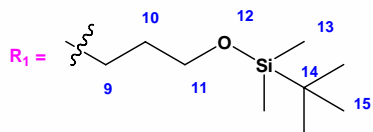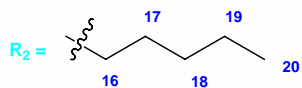

**3**

CDCl<sub>3</sub>

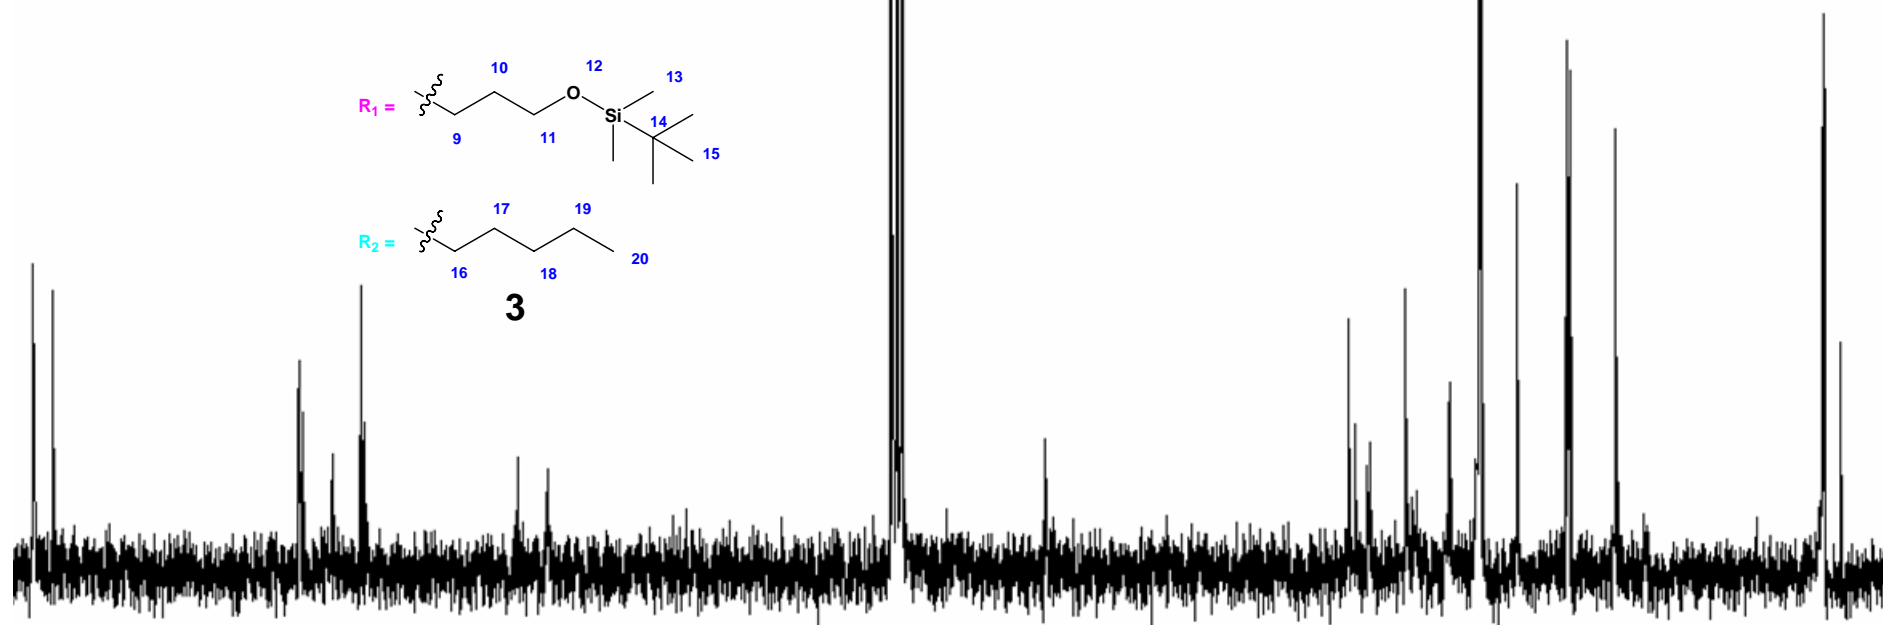

150  
ppm (τ)

100

50

0

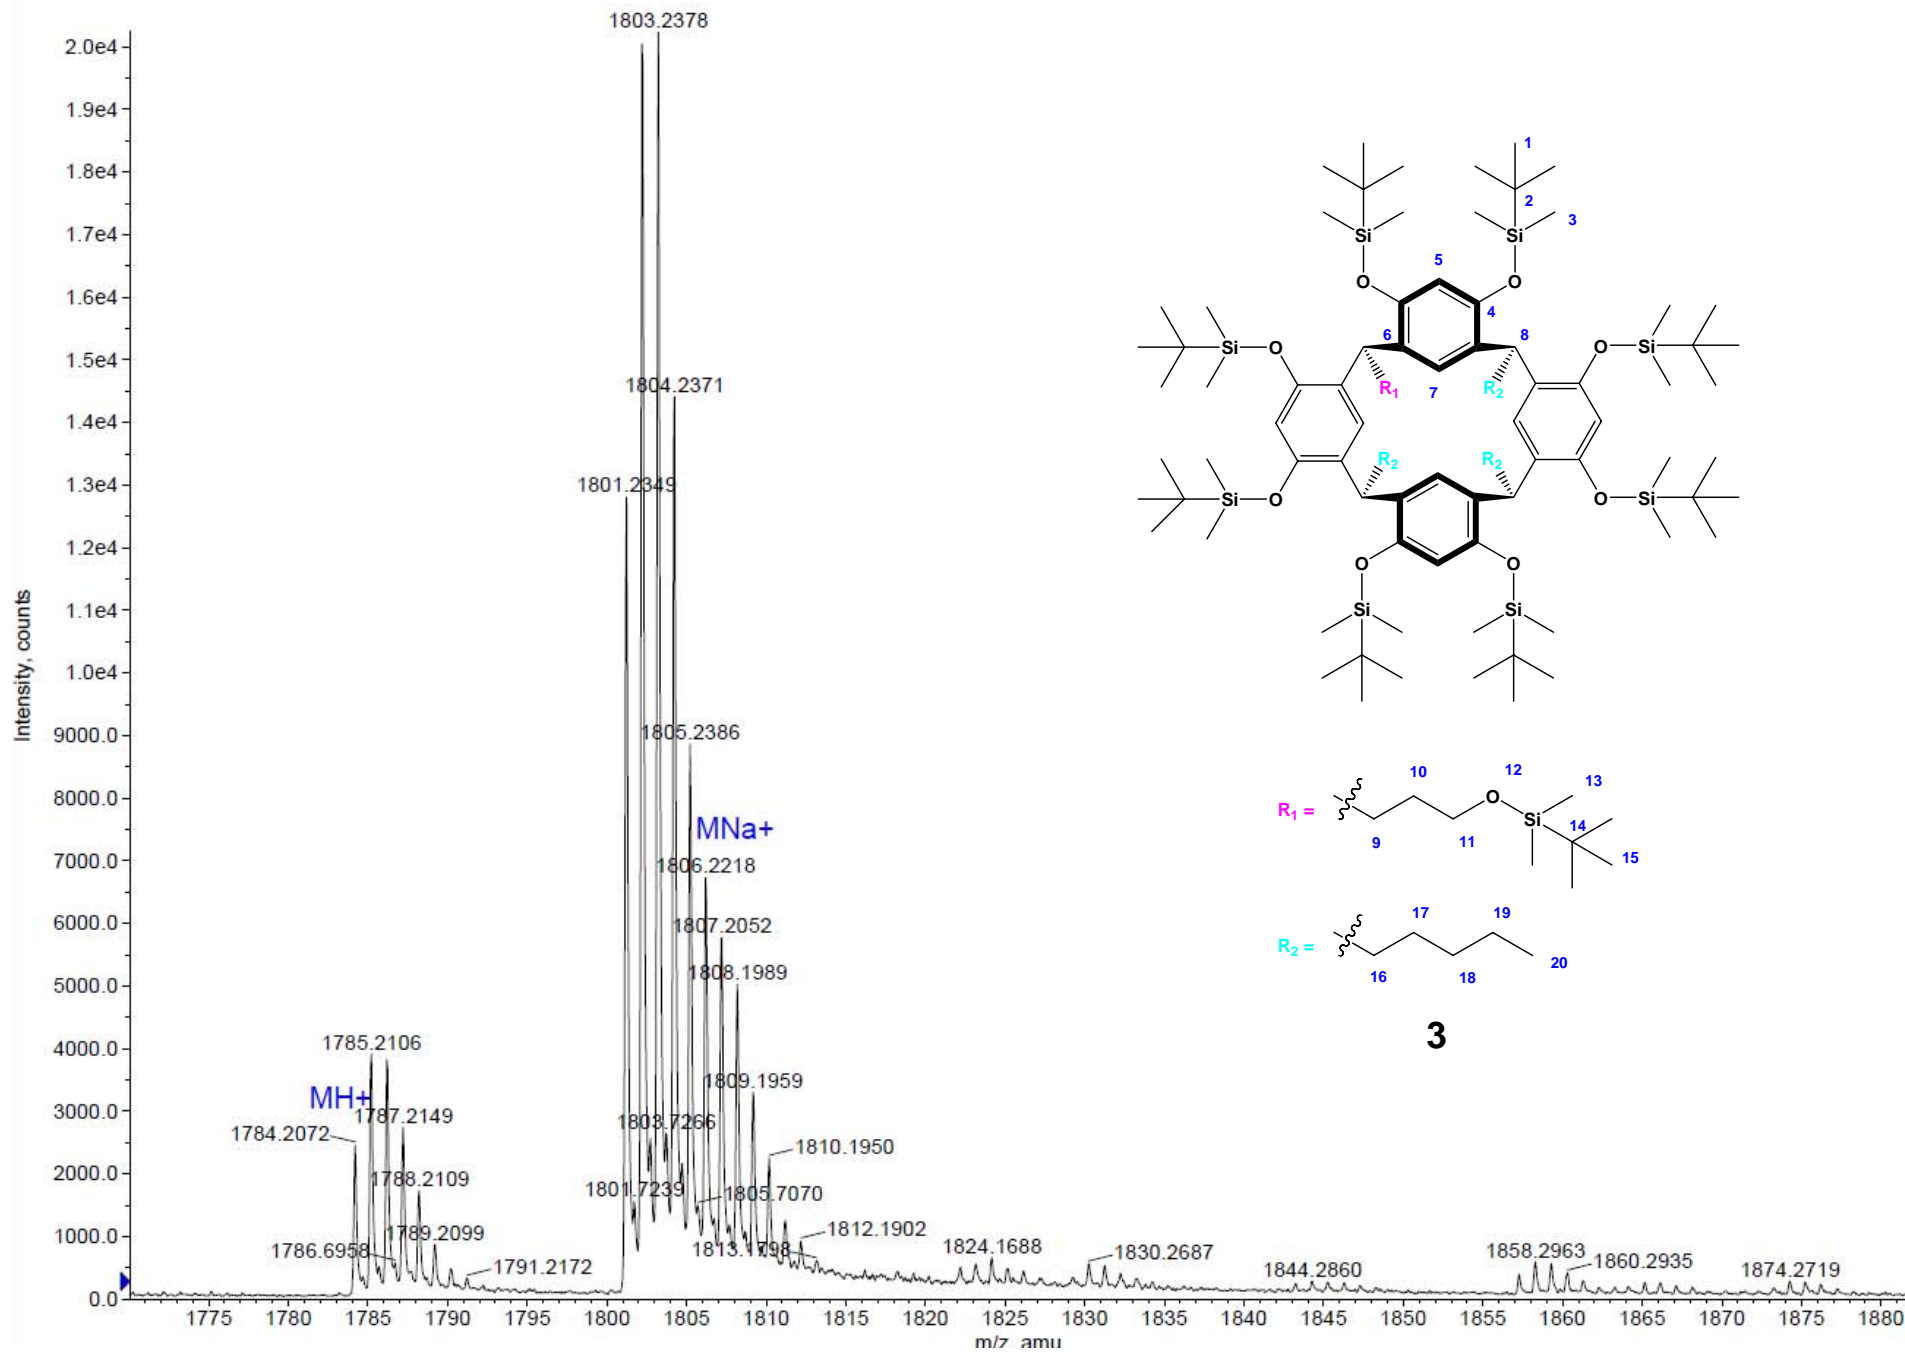



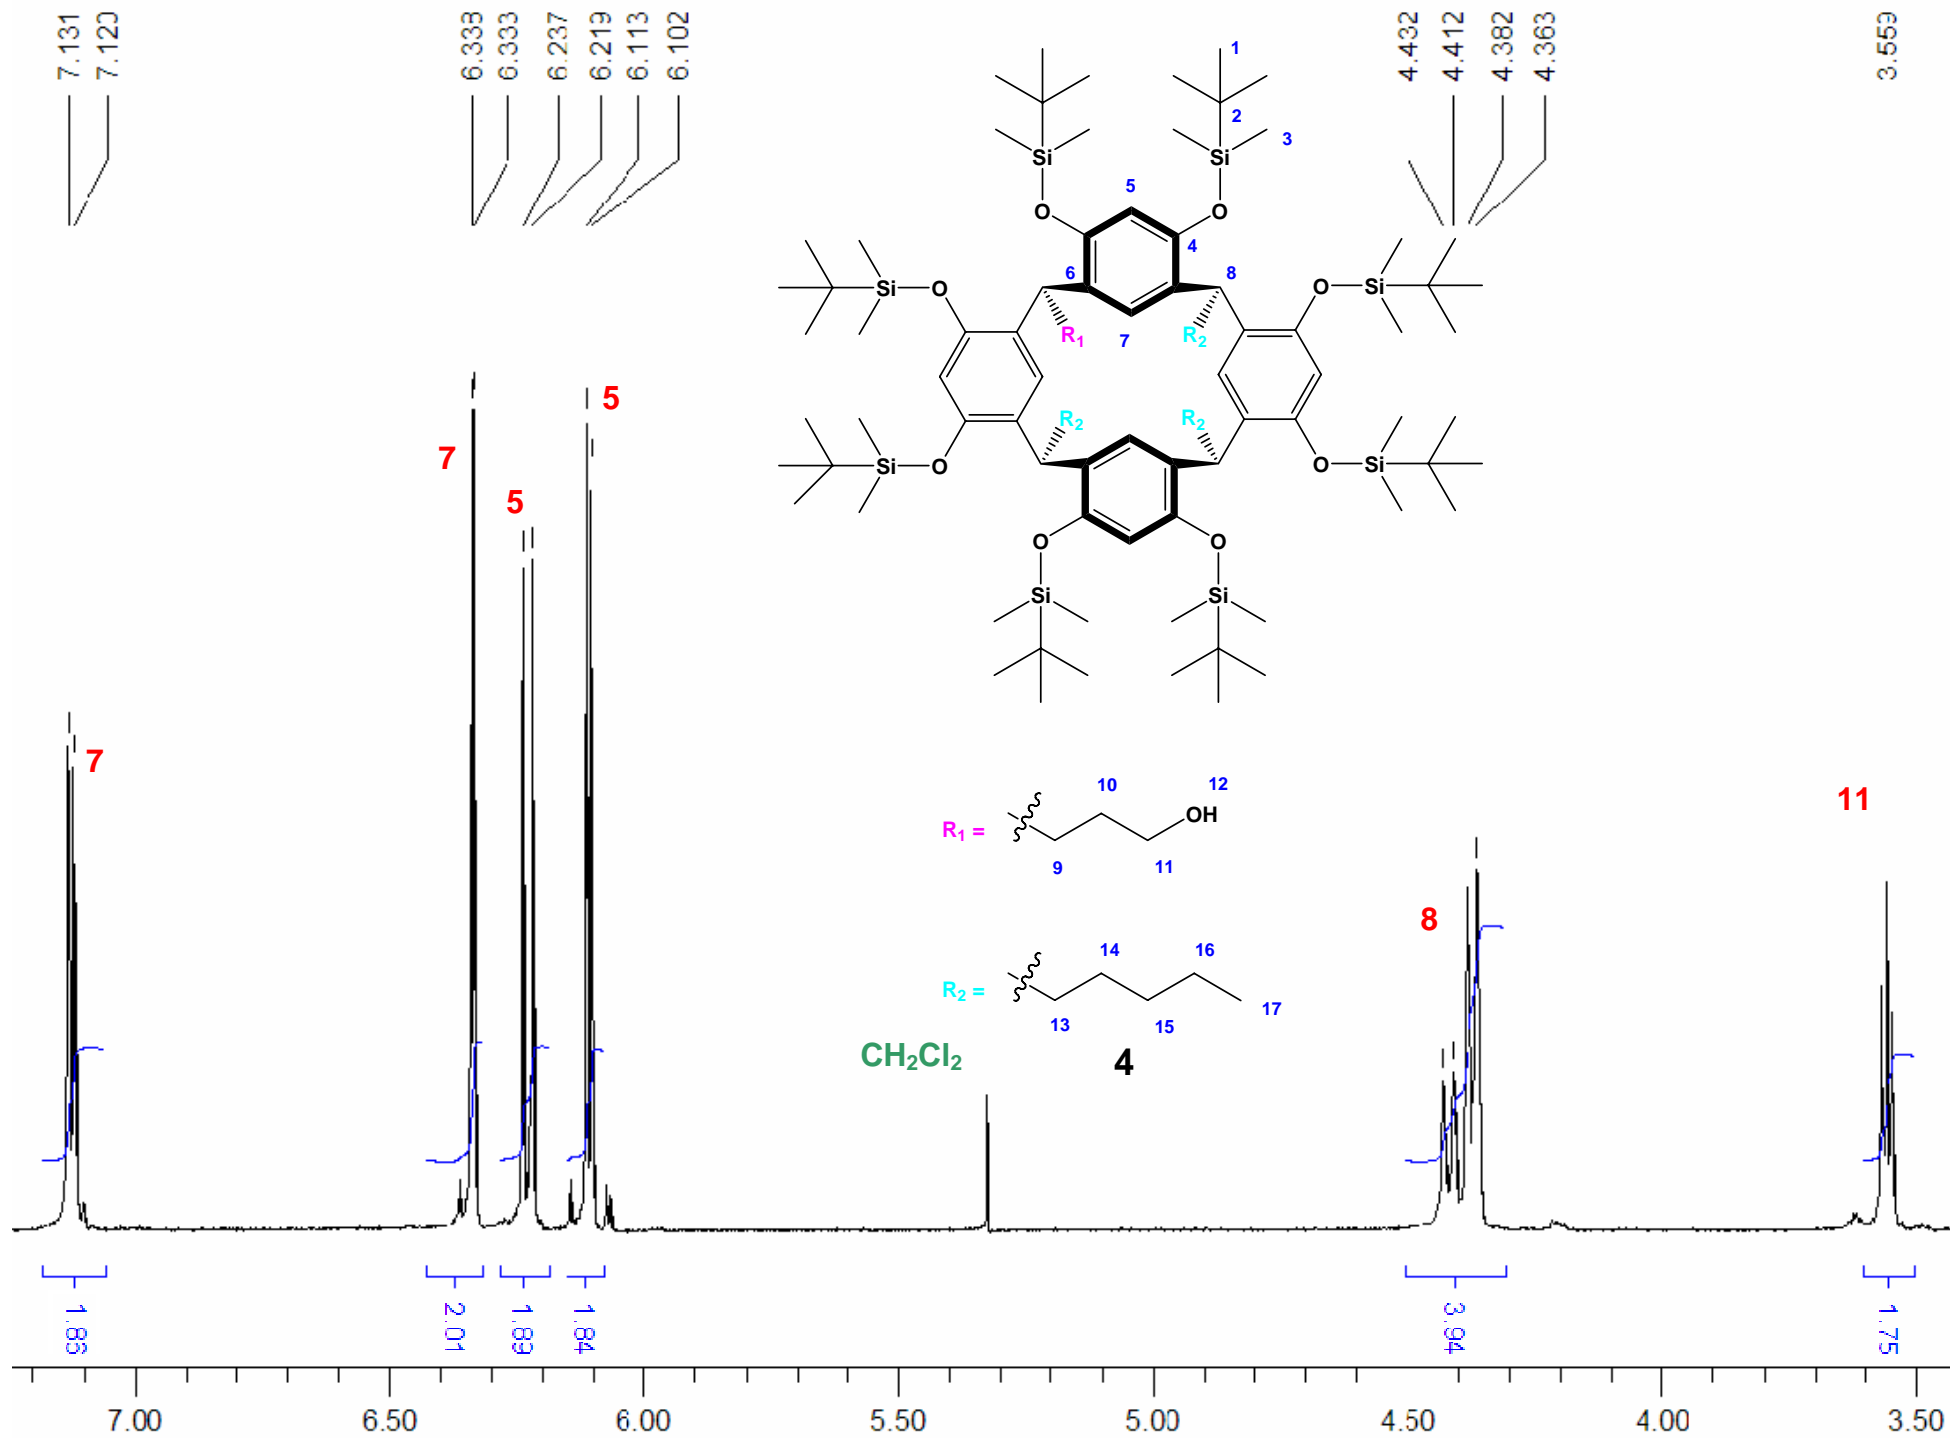

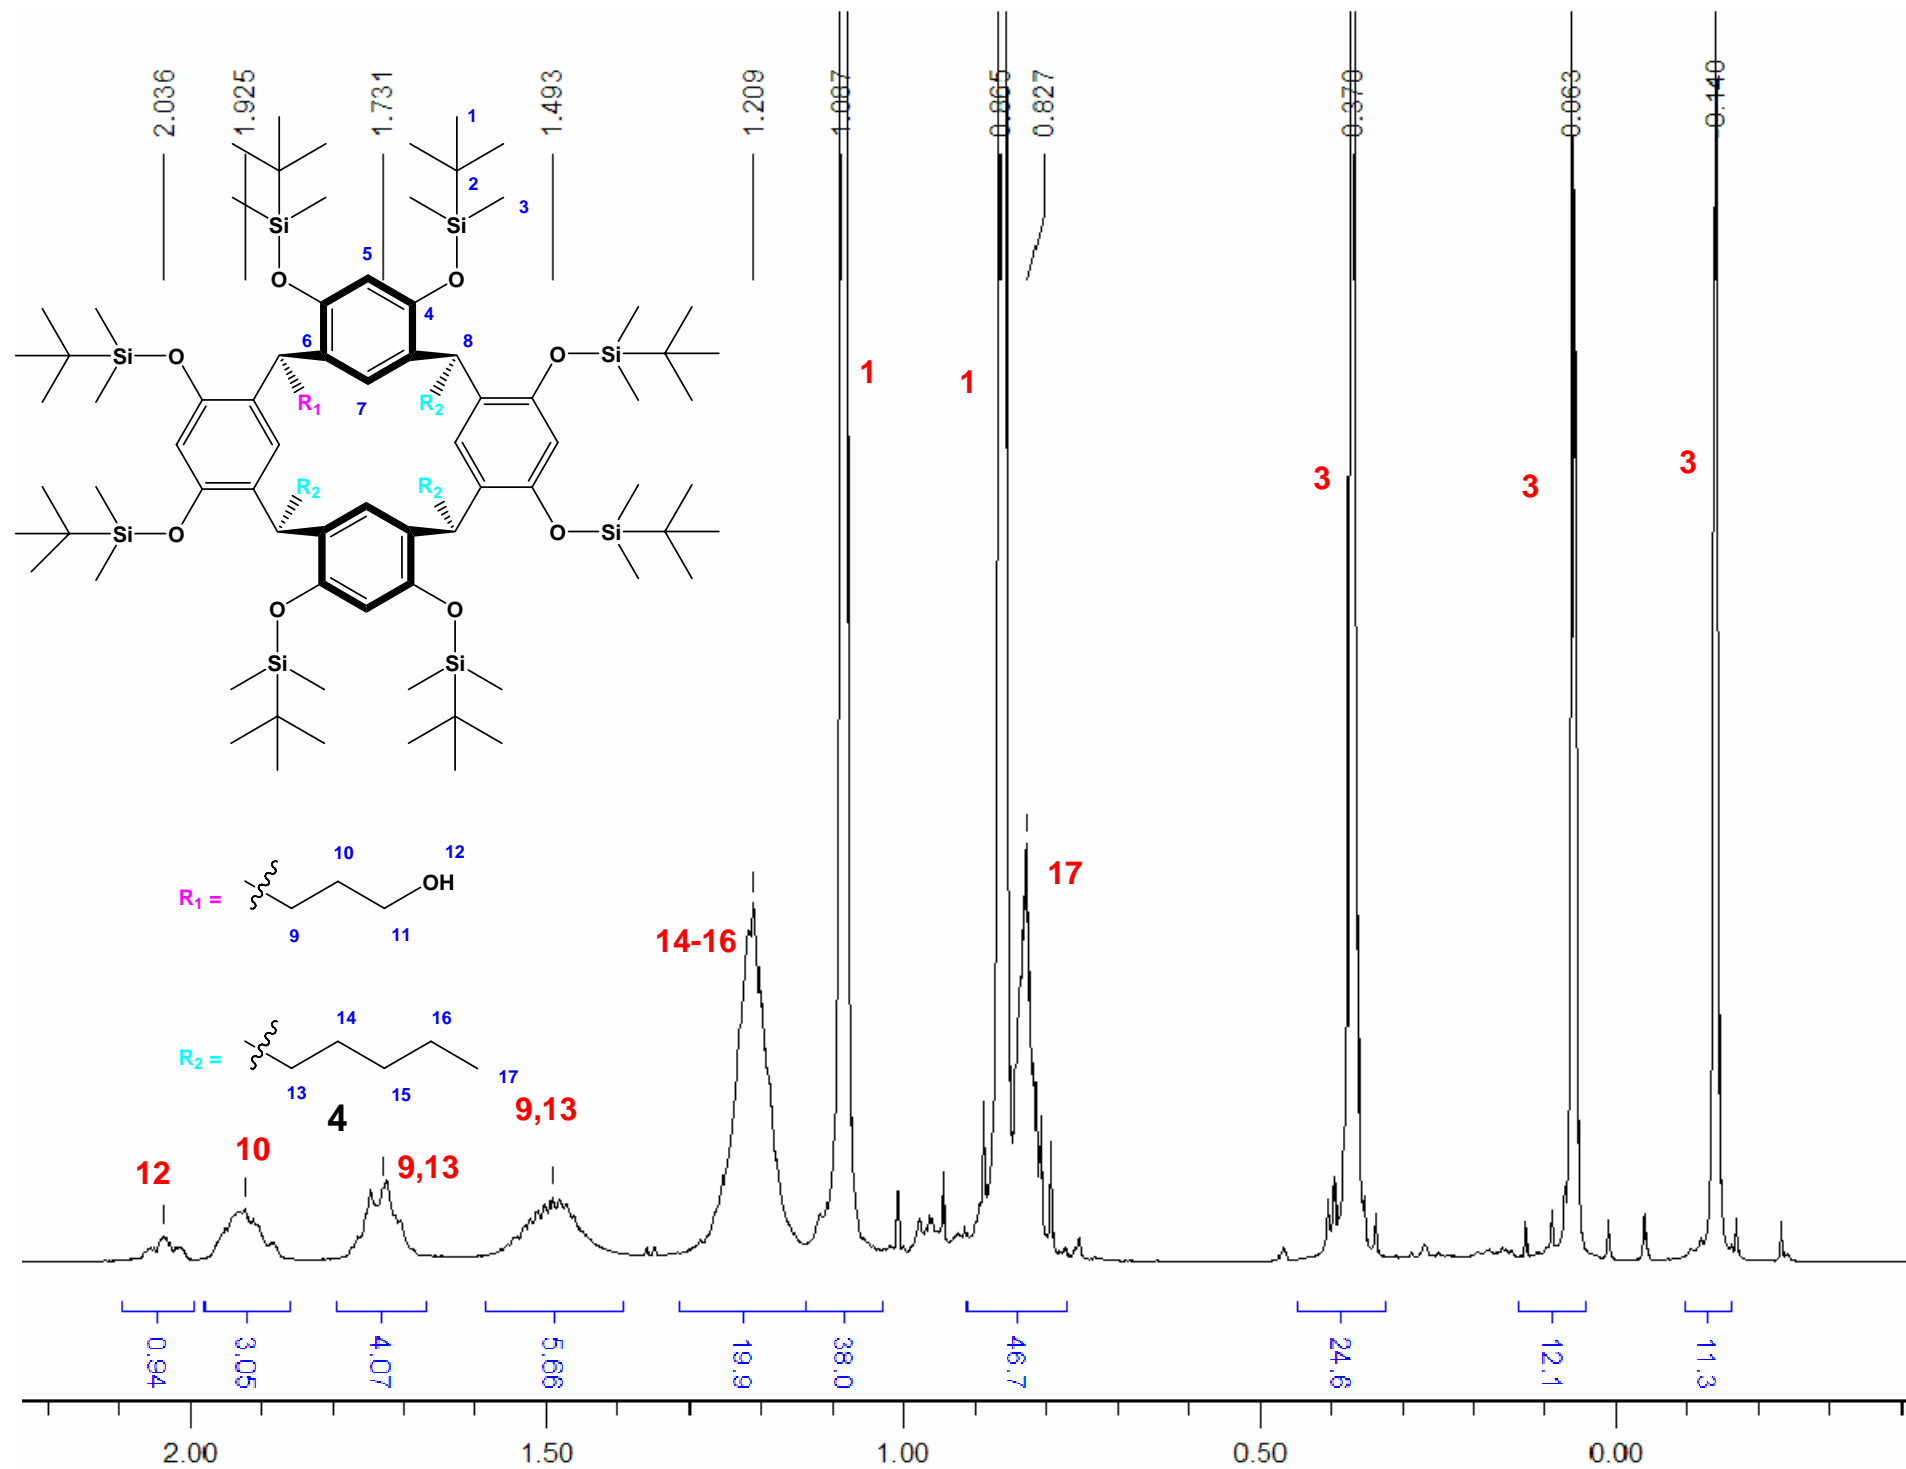

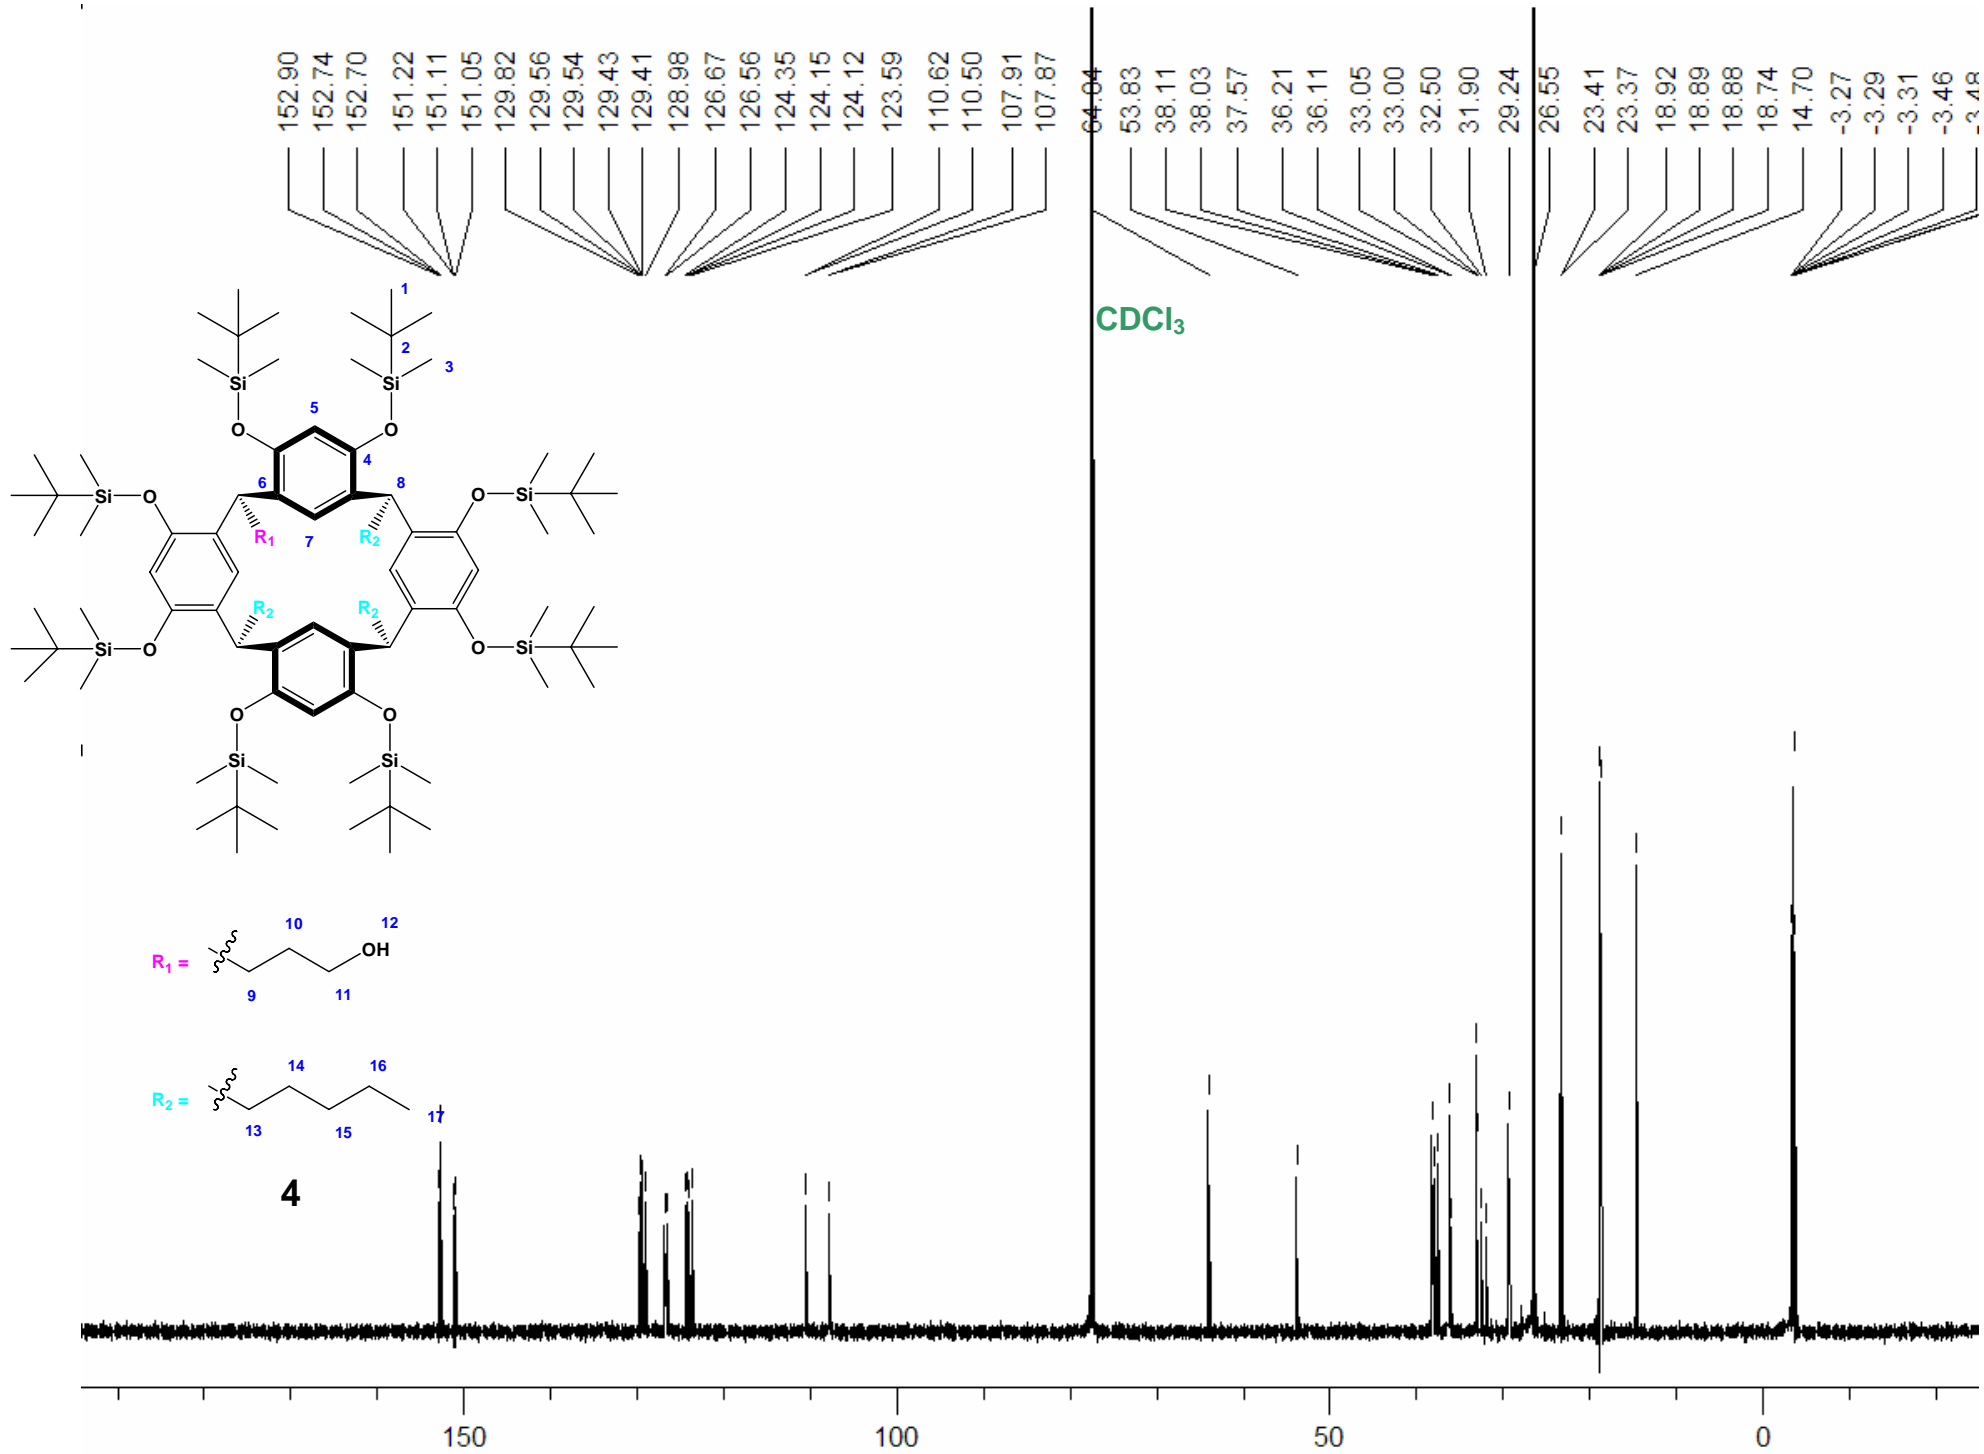

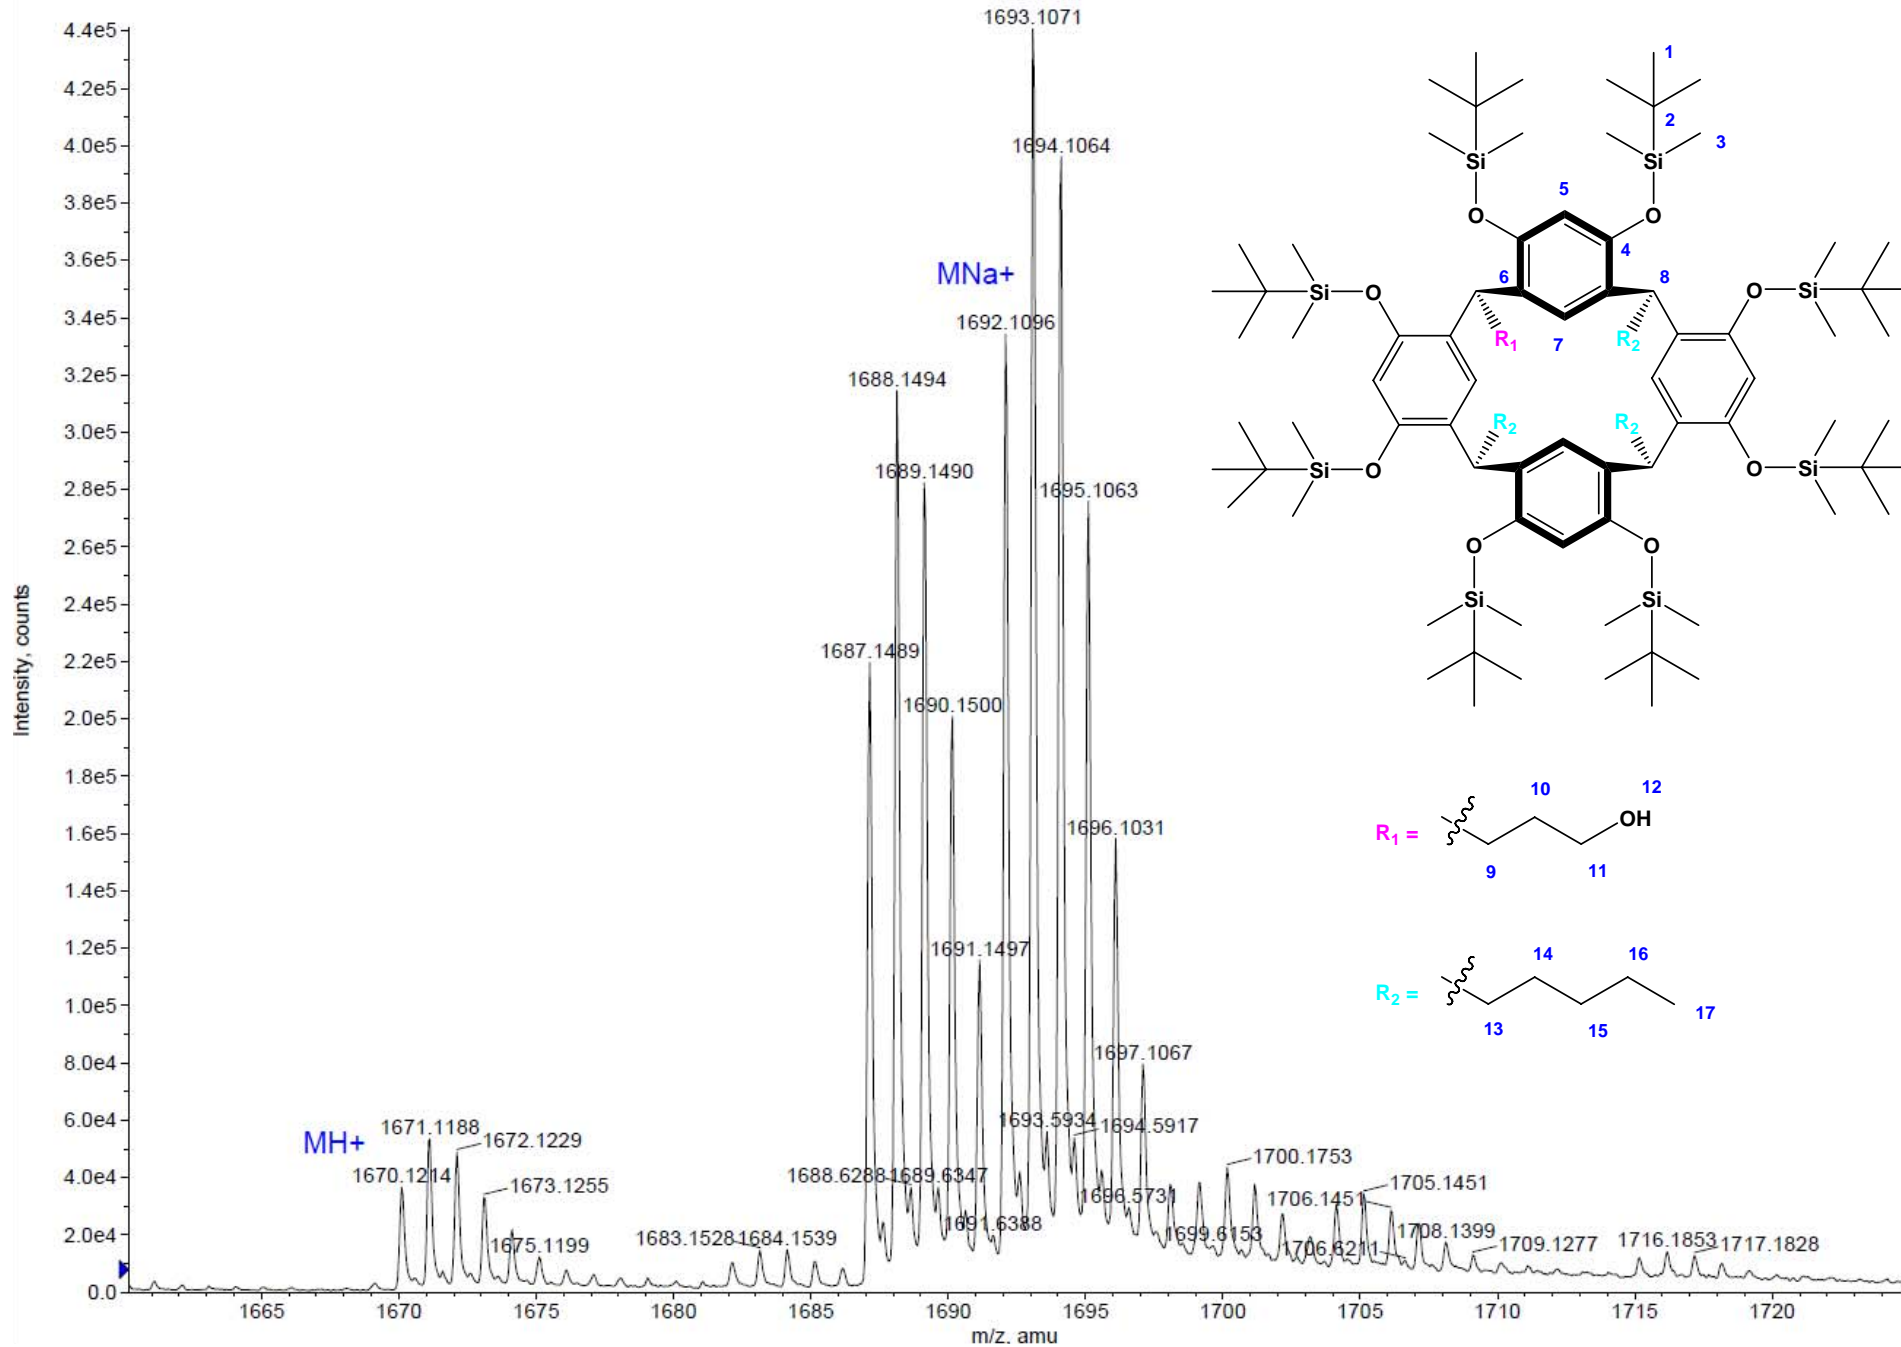

Supplement: b506048f.pdf [file b506048f.pdf]
